# Supplementary material
Source: PubMed Central journal article supplement (PMC6859359)
Supplement: pnas.1909821116.sapp.pdf [file pnas.1909821116.sapp.pdf]

Supplementary Information for

## **Structure of a Tc holotoxin pore provides insights into the translocation mechanism**

Daniel Roderer<sup>1</sup>, Oliver Hofnagel<sup>1</sup>, Roland Benz<sup>2</sup>, Stefan Raunser<sup>1,\*</sup>

<sup>1</sup>Department of Structural Biochemistry, Max Planck Institute of Molecular Physiology, Otto-Hahn-Str. 11, 44227 Dortmund, Germany

<sup>2</sup>Department of Life Sciences and Chemistry, Jacobs University Bremen, Campusring 1, 28759 Bremen, Germany

\*Correspondence to: stefan.raunser@mpi-dortmund.mpg.de

### **This PDF file includes:**

Supplementary text  
Figures S1 to S11  
Legends for Movies S1 to S6  
Tables S1 to S3  
SI References

### **Other supplementary materials for this manuscript include the following:**

Movies S1 to S6

## Supplementary Information Text

### Methods

**Protein production.** *P. luminescens* TcdA1 (TcA) was expressed in *E. coli* BL21-CodonPlus (DE3)-RIPL in LB medium and purified as described previously (1). Fusion proteins *P. luminescens* TcdB2-TccC3 (TcB-TcC(WT)) and cleavage-deficient TcdB2-TccC3 variant D651A (TcB-TcC(D651A)) were also expressed in *E. coli* BL21-CodonPlus (DE3)-RIPL in LB medium and purified as described previously (2), as well as all TcB-TcC mutants. The nanodisc scaffold protein MSP1D1 was expressed and purified using pMSP1D1 (Addgene #20061) as described previously (3).

**Holotoxin formation and nanodisc integration.** TcdA1 and TcdB2-TccC3(WT) or TcdB2-TccC3(D651A) were mixed with a 1.5-fold excess of TcB-TcC over TcA pentamer and subsequently the excess of TcB-TcC was separated from the holotoxin by size exclusion chromatography (SEC) on a Superose 6 5/150 column (GE Life Science). For ABC(D651A), the holotoxin was concentrated to 1 mg/ml and mixed with a 12-fold molar excess of pre-formed MSP5ΔH5-POPC nanodiscs (Cube Biotech) in 20 mM Tris-HCl pH 8.0, 250 mM NaCl, followed by 1 h of incubation on ice. For ABC(WT), nanodiscs were pre-formed using MSP1D1 and POPC in a 1:55 molar ratio. The holotoxin was concentrated to 1.2 mg/ml and mixed with a 10-fold molar excess of nanodiscs in 20 mM Tris-HCl pH 8.0, 250 mM NaCl, followed by 1 h of incubation on ice. Subsequently, the holotoxin/nanodisc mixtures were dialyzed against 20 mM CAPS-NaOH pH 11.2, 250 mM NaCl for 2 days at 4 °C. After dialysis, the holotoxin/nanodisc mixtures were subjected to SEC on a Superose 6 5/150 column equilibrated in 20 mM Tris-HCl pH 8.0, 250 mM NaCl, and the main peak containing ABC in nanodiscs was used for subsequent cryo-EM (SI Appendix, Fig. S1B,C).

**Liposome overlay assay.** TcA (1 mg/ml) was mixed with different lipid mixes dissolved in 5% β-D-octylglucoside (Anatrace) with a total lipid concentration of 5 mg/ml. We tested POPC, POPC + 20% liver PI, POPC + 20% POPG, POPC + 20% cholesterol, POPC + 20% sulfatide (porcine brain), DOPC, BPL and ECL. All lipids were purchased from Avanti Polar Lipids (Alabaster, AL 35007). After 1 h of incubation of TcA and lipids dissolved in OG at 4 °C and pH 8, the mixtures were dialyzed against 20 mM CAPS-NaOH pH 11.2, 150 mM NaCl for 2 days at 4 °C. Subsequently, the dialyzed proteoliposomes were mixed 1:1 with 60% glucose in dialysis buffer to 100 μl total volume, overlaid with 125 μL 25% glucose and 30 μL dialysis buffer and centrifuged at 175,000×g for 4 h at 4 °C in a Beckman TLA 120.1 rotor. After centrifugation, the top and bottom fractions of the sucrose gradient were analyzed via SDS-PAGE and the respective TcA amounts were quantified via band densitometry.

**Single channel conductance measurements.** We measured the single channel conductance of TcA with different lipid compositions with black lipid membrane experiments. All lipids were obtained from Avanti Polar Lipids. The instrumental setup consisted of a Teflon chamber with two compartments of 5 ml each which are connected by a small hole with a surface area of 0.4 mm<sup>2</sup>. The membrane current was measured with a pair of Ag/AgCl electrodes with salt bridges. The electrodes were switched in series with a voltage source and homemade current amplifier on the basis of Burr Brown operational amplifier as described previously (1). Solutions of different lipids and lipid mixes (SI Appendix, Fig. S10) at 10 mg/ml total lipid concentration were prepared in 80% n-decane/20% butanol. The lipid solutions were “painted” across the hole, resulting in membrane formation. After the membrane turned black, 20 pM of TcA were added to the cis side (the black side) of the chamber. All measurements were performed with a membrane potential of 20 mV in 20 mM CAPS-NaOH pH 11, 1 M KCl.

**Sample vitrification and cryo-EM data acquisition.** For ABC(D651A), 2.4 μL of 0.12 mg/ml of the protein preparation were applied to glow-discharged holey carbon grids (Quantifoil, QF 2/1, 300 mesh) covered with a 2 nm carbon layer. 1.2 μL of 0.1% Tween-20 was added to the sample on the grid and blotting was performed immediately afterwards using a Cryoplunge3 (Cp3, Gatan) with

2.2 s blotting time at 20 °C and 90% humidity. For ABC(WT), 2.8 µl of 0.10 mg/ml of the protein preparation were applied to glow-discharged holey carbon grids (Quantifoil, QF 2/1, 300 mesh) covered with a 2 nm carbon layer. Blotting was performed using a Vitrobot Mark IV (Thermo Fisher) with 2.5 s blotting time at 5 °C and 100% humidity.

For ABC(D651A), two data sets were collected at a Cs-corrected Titan Krios EM (Thermo Fisher) equipped with an XFEG and a Falcon III direct electron detector operated in linear mode. Images were recorded using the automated acquisition program EPU (FEI) at a magnification of 59,000, corresponding to a pixel size of 1.11 Å/pixel on the specimen level. 12,040 movie-mode images were acquired in total in a defocus range of 1.2 to 2.6 µm. The total integration time was 1.5 s, partitioned into 40 movie frames with a total cumulative dose of ~ 100 e<sup>-</sup>/Å<sup>2</sup>. The data sets were merged for image processing.

For ABC(WT), one data set was collected at a Cs-corrected Titan Krios EM (Thermo Fisher) equipped with an XFEG and a K2 direct electron detector (Gatan). Images were recorded using the automated acquisition program EPU (FEI) at a magnification of 130,000, corresponding to a pixel size of 1.05 Å/pixel on the specimen level. 2,660 movie-mode images were acquired in a defocus range of 1.4 to 2.6 µm. Each movie comprised 40 frames acquired over 15 s with a total cumulative dose of ~ 61 e<sup>-</sup>/Å<sup>2</sup>.

### Image processing

After initial screening, 8,903 integrated images were selected for further processing for ABC(D651A), and 2,053 integrated images were selected for further processing for ABC(WT). Movie frames were aligned, dose-corrected and averaged using MotionCor2 (4). CTF parameters were estimated using CTER (5), implemented in the SPHIRE software package (6). Outlier images were removed using the graphical CTF assessment tool in SPHIRE (6). For ABC(D651A), 2,400 particles were manually picked initially and 2D class averages used as an autopicking template were generated using ISAC (7) in SPHIRE. 619,594 particles were auto-picked from the images using Gautomatch (8) and extracted with a box size of 384 pixels. For ABC(WT), 390,353 particles were auto-picked using crYOLO (9) using a box size of 300 pixels. 269,142 particles were subsequently extracted using a box size of 420 pixels.

Reference-free 2D classification and cleaning of the dataset was performed with the iterative stable alignment and clustering approach ISAC in SPHIRE. ISAC was performed with a pixel size of 5.61 Å/pixel for ABC(D651A) and 5.80 Å/pixel for ABC(WT) on the particle level. The 'Beautifier' tool of SPHIRE was then applied to obtain refined and sharpened 2D class averages at the original pixel size, showing high-resolution features (SI Appendix, Fig. S2B, S5B). Only particles in ISAC classes showing a full holotoxin in the pore form were kept for 3D refinement, resulting in 337,823 particles for ABC(D651A) and 64,806 particles for ABC(WT), respectively.

We used the cryo-EM density map of the TcdA1 pore (EMD-4068 (2)), manually docked with a molecular map of TcB-TcC (pdb ID 4O9X) and filtered to 25 Å, as initial reference for 3D refinement. 3D refinement without imposing symmetry was performed in SPHIRE using MERIDIEN (6), using 7.5° initial angular sampling. 3D classification using SORT3D in SPHIRE, based on the final projection parameters of MERIDIEN, resulted in classes with different orientations of the asymmetric TcB-TcC cocoon in TcA. Therefore, one 3D class with well-defined density of TcB-TcC was locally refined, filtered to 5 Å and used as initial template in a new 3D refinement with 1.875° initial angular sampling. The resulting map provided a clearly defined density and only one distinct orientation of TcB-TcC for both ABC(D651A) and ABC(WT).

Post-processing of the final density maps obtained by 3D refinement was performed with the PostRefiner tool of SPHIRE using a soft Gaussian mask, resulting in final average resolutions of 3.9/3.4 Å for ABC(D651A) and 3.9/3.4 Å for ABC(WT), respectively, according to FSC 0.5/0.143 (SI Appendix, Fig. S2C, S5C). B-factors were -78.09 Å<sup>2</sup> for ABC(D651A) and -61.28 Å<sup>2</sup> for ABC(WT), respectively. Local FSC calculations were performed using the Local Resolution tool in SPHIRE. (SI Appendix, Fig. S2E, S5E). The density maps were filtered according to its local resolutions using the 3D Local Filter tool in SPHIRE.

To achieve a better local resolution in the TcB-TcC part of the map of ABC(D651A), we re-boxed particles after shifting the center of the map by 70 pixels to the center of the TcB-TcC cocoon using the final projection parameters of MERIDIEN (SI Appendix, Fig. S3A-C), and we ran MERIDIEN with the re-boxed particles. Post-processing, local FSC calculation and local filtering was performed

as described previously for the full map. The overall resolution of the obtained map is 4.2/3.7 Å according to FSC 0.5/0.143 (SI Appendix, Fig. S3E). 3D variability estimation was performed with *sx3dvariability* in SPHIRE. The input images were low-pass filtered to 25 Å and 20 images were used per projection.

#### **Atomic model building and refinement**

The cryo-EM density map of ABC(D651A) was used for atomic model building and refinement. Initially, models of TcdA1 in the pore form (pdb ID 5LKH and 5LKI) and TcB-TcC (pdb ID, 6H6F) were rigid-body fitted into the density map of the holotoxin. The chains of TcA, and the TcB-TcC fusion protein were individually fitted into the density map using *Imodfit* (10) to improve the initial fit of the model. Subsequently, we modeled the atomic structure of the holotoxin using an iterative combination of manual model building in *Coot* (11), *Rosetta* relaxation and *Phenix* real-space refinement (12) without imposing symmetry. Residues 1,382-1,491 of all TcA chains were removed, as the map showed insufficient density and resolution in that regions.

After initial modeling in the full holotoxin map, the model of TcB-TcC was further improved using the shifted map (SI Appendix, Fig. S6D,E), which allowed model building of the first residues of the ADP-ribosyltransferase of TccC3 after the mutated aspartyl protease cleavage site.

We created a fragment library of the ADP-ribosyltransferase (residues 679 – 960 of TcC) using the *Robetta* webserver (13) and attempted *de novo* building of the fragments into the density in the TcB channel using *Rosetta*. However, *Rosetta de novo* model building failed to create a reproducible model. We therefore manually built an unfolded Poly-Ala peptide in C-N translocation direction into the most well-defined density in the TcB channel. Afterwards, we added side chains at regions with sufficient density of possible peptide stretches close to the C-terminus of the ADP-ribosyltransferase and chose the best fitting model (SI Appendix, Fig. S7B).

The final models were validated by *Rosetta* relaxation against two independent half-maps (14), *EMringer* (15) and *MolProbity* (16) (SI Appendix, Table S1).

#### **Cross-linking mass spectrometry**

We incubated a 3 μM solution of TcB-TcC (WT or D651A) in 20 mM HEPES-NaOH pH 7.5, 150 mM NaCl with 3 mM disuccinimidyl dibutyric urea (DSBU, Thermo Fisher) for 30 min at 25 °C. The cross-linking reaction was stopped by adding 100 mM Tris, followed by acetone precipitation. The precipitate was dissolved in 8 M urea, 1 mM DTT and alkylated with 5.5 mM iodacetamide for 30 min at 25 °C. Afterwards, we diluted the solution 2-fold with 20 mM NH<sub>4</sub>HCO<sub>3</sub> and digested with 1/50 molar ratio of endopeptidase LysC (Serva, MS grade) for 3 h at 25 °C. Afterwards, we diluted again 2-fold with 20 mM NH<sub>4</sub>HCO<sub>3</sub>, added 1/100 molar amount of Trypsin (Sigma, MS grade) and continued proteolysis for 12 h at 25 °C. Proteolysis was stopped by 0.1% trifluoroacetic acid and the peptides were separated on a Superdex 30 increase 3.2-30 column (GE Life Science) equilibrated in 30% acetonitrile as described previously (17). Peptides eluting between retention volumes of 1.2 and 2.0 mL were collected in 100 μL fractions, evaporated in a speedvac and subsequently analyzed via LC-MS by the mass spectrometry facility of the Max Planck Institute of Molecular Physiology. Crosslinks were evaluated using *MeroX* (18) and visualized in *xVis* (19).

#### **Bioinformatics tools.**

Analysis of the TcB channel diameter and constrictions was performed with *ChExVis* (20) and visualized in UCSF Chimera (21). For visualization of the Coulomb potential, TcB was protonated using H<sup>++</sup> (22) at pH 7.0 and an ionic strength of 150 mM. Homologs of TcdB2 were identified using *Protein BLAST* (23) and sequences of TcdB2 and 6 homologs were aligned in *Clustal Omega* (24). Sequence conservation of the hydrophobic and negatively charged patches in TcB and of the aspartyl protease cleavage site were analyzed with *ConSurf* (25) and visualized in UCSF Chimera.

## Supplementary Figures

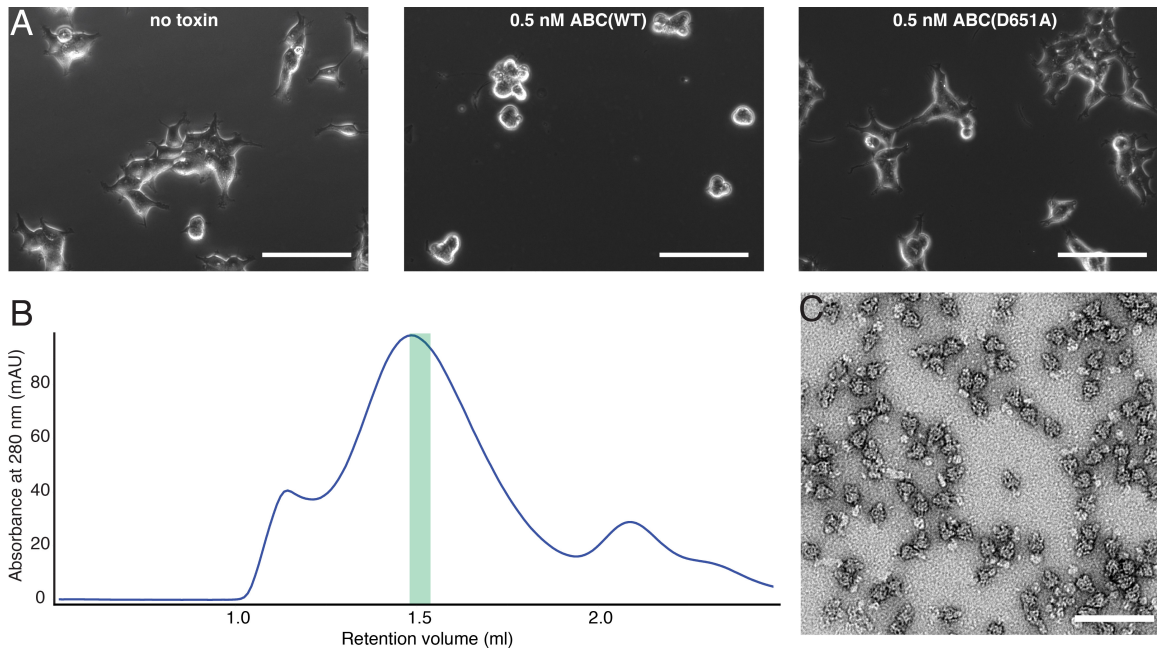

**Fig. S1. Comparison of toxicity of ABC(WT) and ABC(D651A) and preparation of ABC(D651A) in nanodiscs.**

A: Intoxication of HEK 293T cells with ABC(WT) and ABC(D651A).  $2 \times 10^4$  cells in DMEM/F12 medium were incubated with PBS or 0.5 nM of ABC for 16 h at 37 °C before imaging. Experiments were performed in triplicate with qualitatively identical results. Scale bars, 100  $\mu$ m. B: Size exclusion chromatography of ABC(D651A) after integration in MSP5 $\Delta$ H5-POPC nanodiscs. The main peak fraction indicated in green was used for cryo-EM. C: Negative-stain electron micrograph of the peak fraction indicated in A, showing predominantly holotoxin pores. Scale bar, 100 nm.

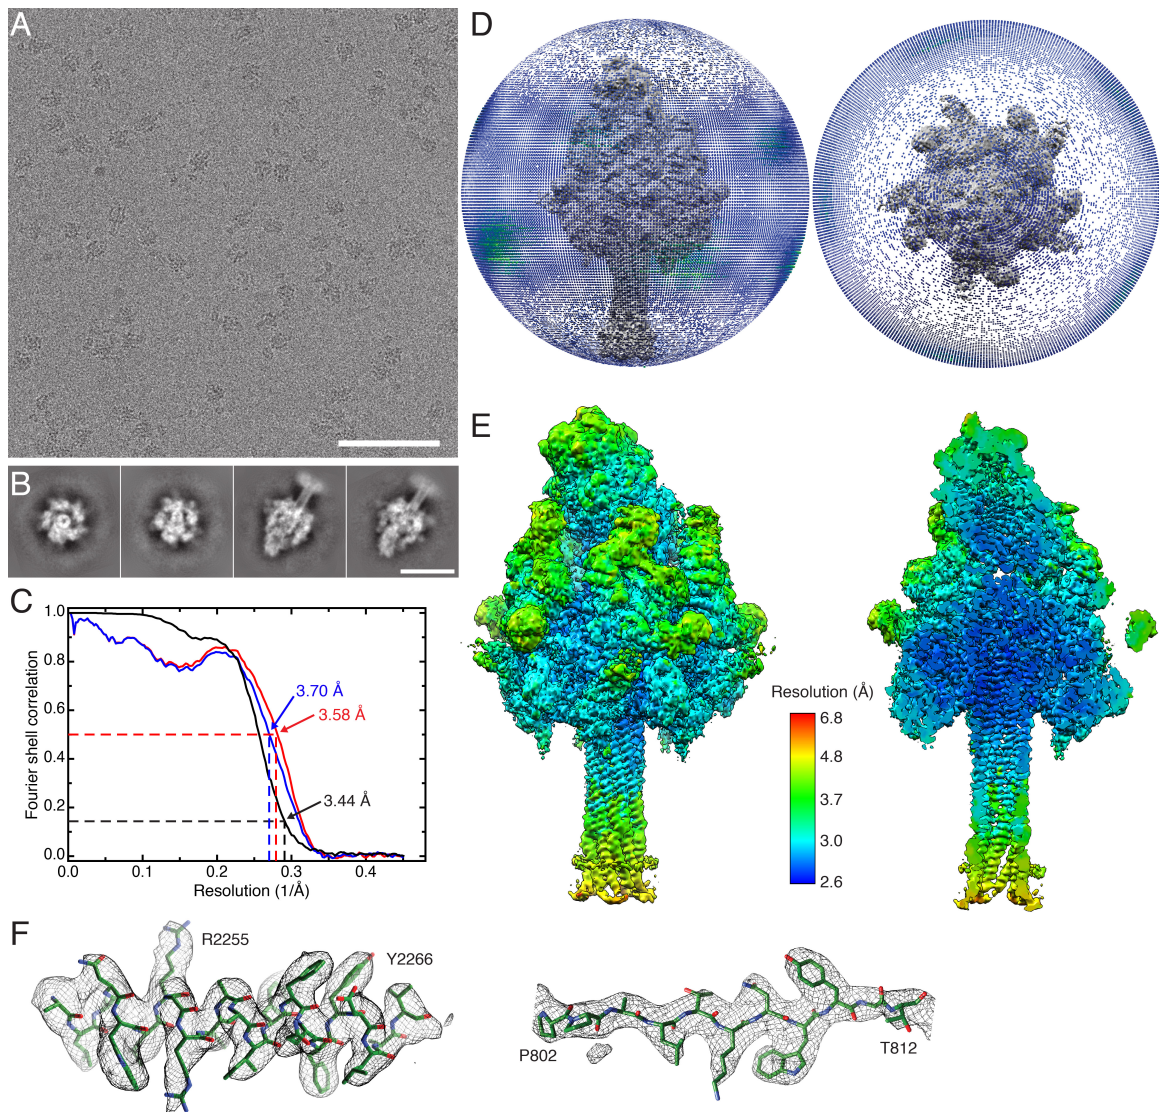

**Fig. S2. Cryo-EM of ABC(D651A) in a nanodisc.**

A: Representative electron micrograph of vitrified ABC(D651A) at 2.1  $\mu\text{m}$  defocus and 100  $\text{e}^-/\text{\AA}^2$  total dose acquired with a Falcon 3 direct electron detector. Scale bar, 100 nm. B: Representative 2D class averages. Top views (left two images) and side views (right two images) are shown. Scale bar, 20 nm. C: Fourier shell correlation (FSC) of the obtained cryo-EM map (black curve). The 0.143 criterion indicates an average resolution of 3.4  $\text{\AA}$ . The red and blue curves show the map-to-model FSCs of two independently refined half maps. D: Angular distribution plots of the final round of refinement in side view and top view. Each stick represents a projection view. The size and color of sticks (blue-to-green) is proportional to the number of particles. E: Local resolution estimation of the cryo-EM density map, side view (left) and section (right), colored according to local resolution. F: Superimpositions of representative areas of the cryo-EM density maps and the models, shown for an  $\alpha$ -helical part in TcA (left) and a  $\beta$ -strand in TcB (right).

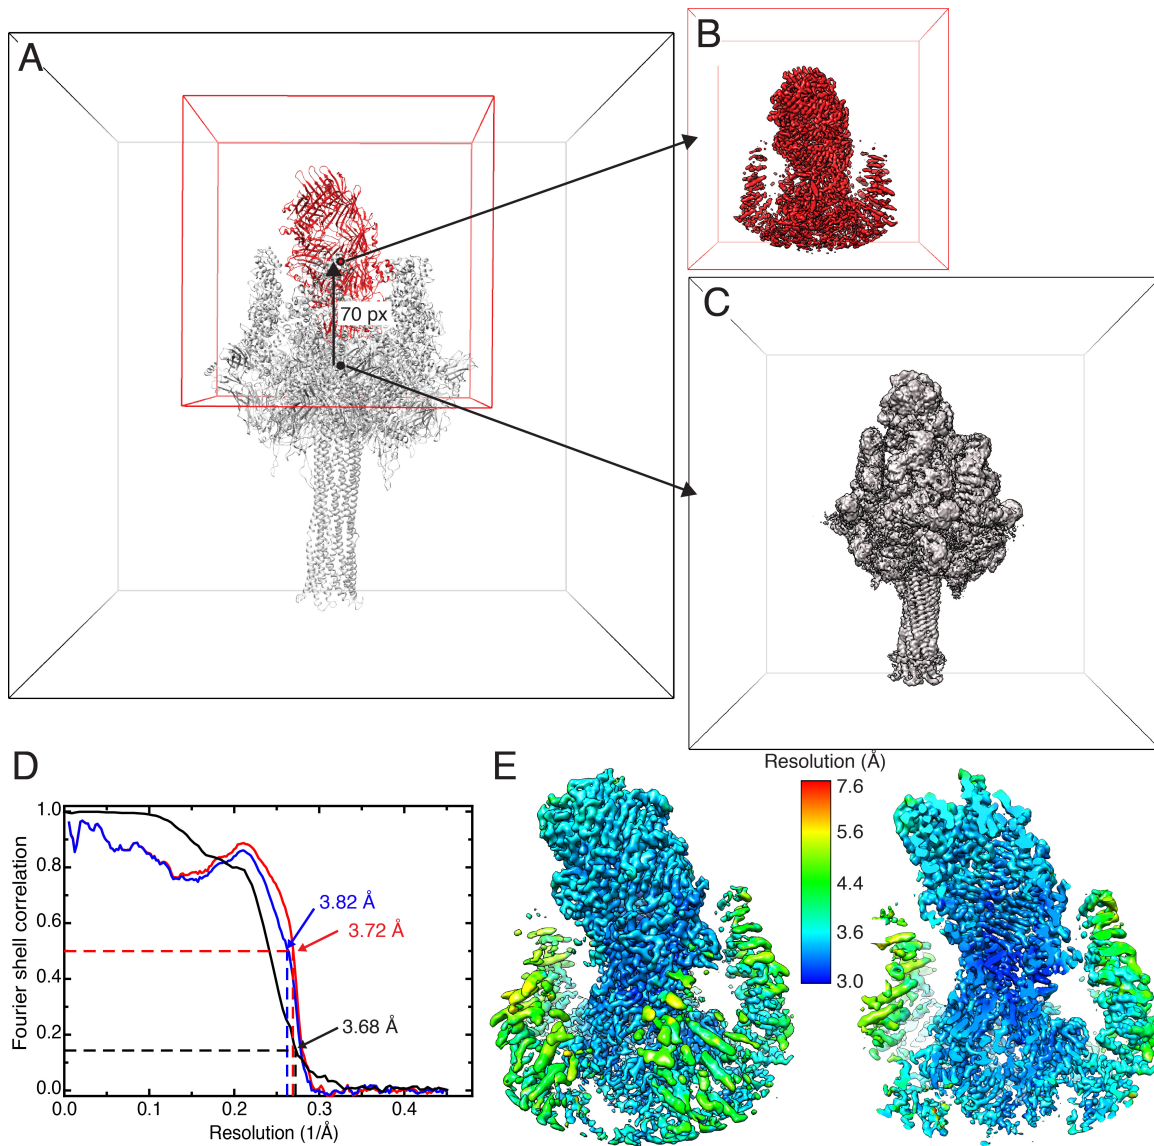

**Fig. S3. Shift of the particle box center from the center of ABC(D651A) to the center of TcB-TcC.**

A: Scheme of shift of box center from the center of the ABC(D651A) holotoxin (black dot) to the center of TcB-TcC (red dot) by 70 pixels (corresponds to 78 Å). The box was re-scaled from 384 pixels to 200 pixels. The model of the holotoxin is shown in the box for comparison, with TcA in gray and TcB-TcC in red. B,C: Cryo-EM maps of the final refinement of the shifted reconstruction (B, red) and the original reconstruction of the full ABC(D651A) holotoxin (C, gray). The particle boxes of the maps are also depicted. D: Fourier shell correlation (FSC) of the obtained cryo-EM map (black curve). The 0.143 criterion indicates an average resolution of 3.7 Å. The red and blue curves show the map-to-model FSCs of two independently refined half maps. E: Local resolution estimation of the cryo-EM map, side view (left) and section (right), colored according to local resolution.

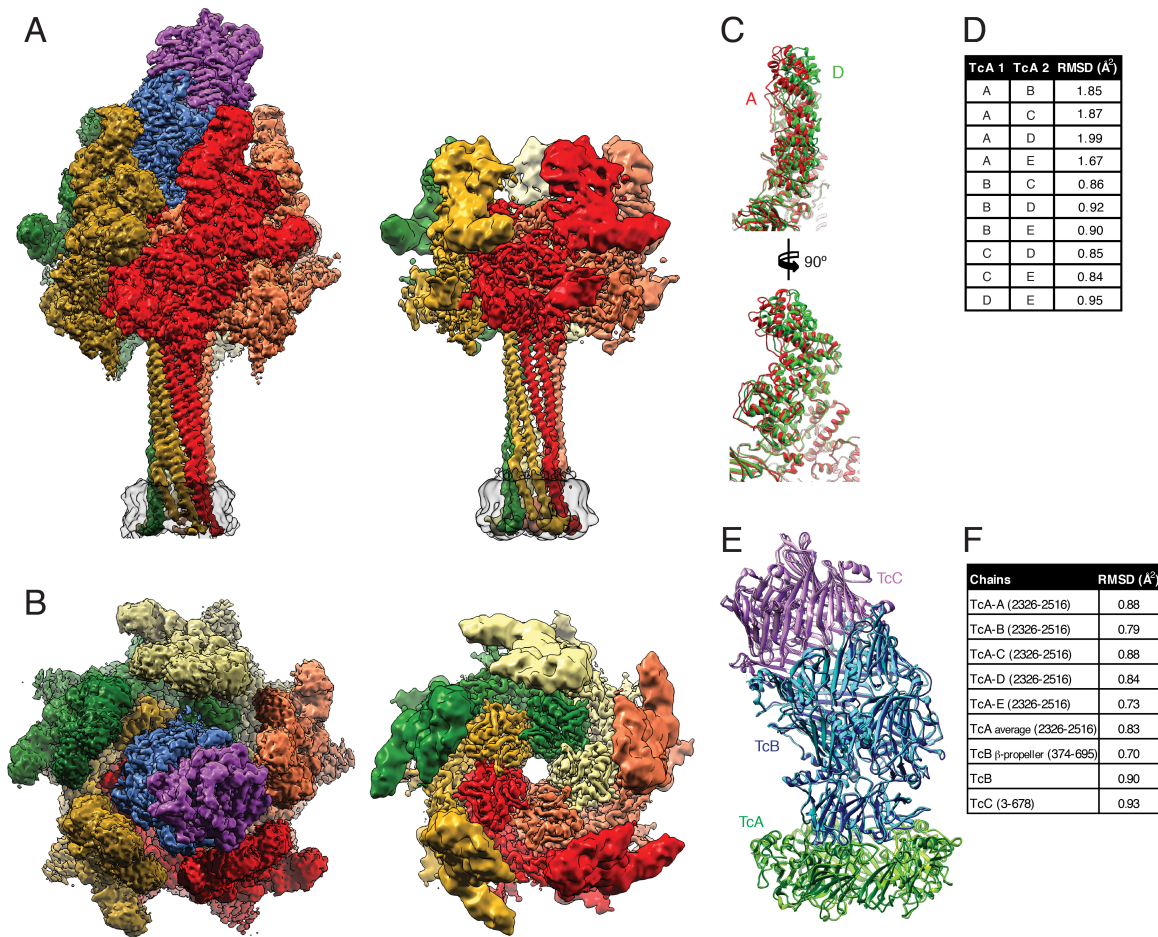

**Fig. S4. Comparison of cryo-EM maps of ABC(D651A) and TcA.**

A: Side view of the density maps of ABC(D651A) and TcA (EMDB 4068) embedded in lipid nanodiscs. B: Top views of the maps in panel A. The individual subunits and the nanodiscs are colored like in Fig. 1A. C: Overlay of the upper parts (residues 290 – 980) of TcA protomers A (red) and D (green). Front view (top) and side view (bottom) show a gradual increase of displacement with further distance to the center of TcA. D: Backbone RMSDs between the individual TcA chains, calculated in Chimera. E: Overlay of models of the TcB-TcC and TcA (residues 2327-2516) of the prepore of ABC(D651A) (pdb ID 6H6F, light colors) with the respective model of the pore of ABC(D651A) (dark colors). The TcB-binding domains of TcA were aligned on each other. F: Backbone RMSDs of the individual TcA chains, all TcA chains combined, the  $\beta$ -propeller domain of TcB, TcB and TcC between the prepore and pore form of ABC(D651A). RMSD values were calculated in Chimera



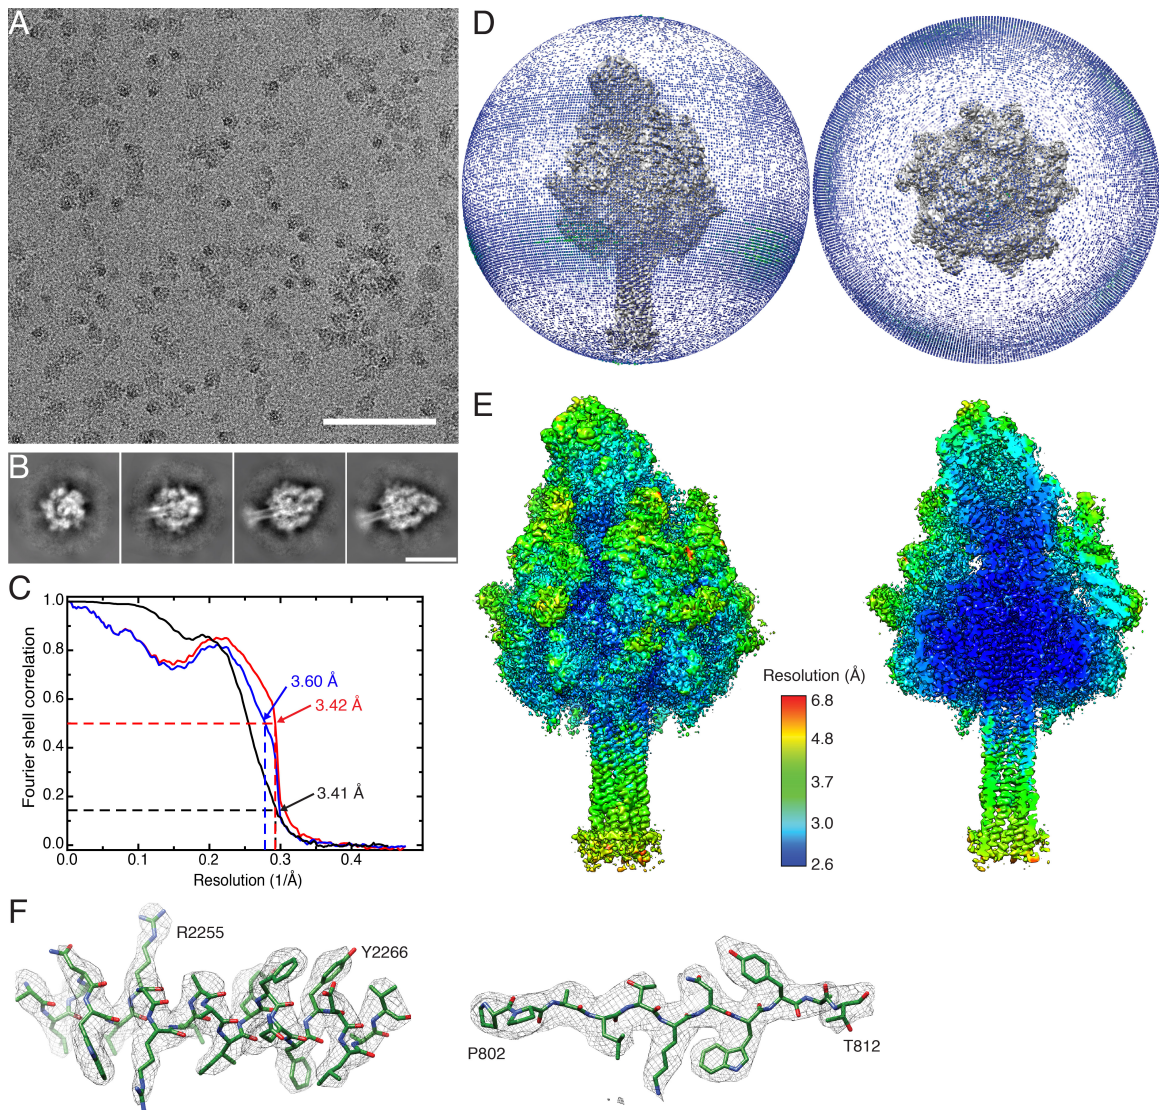

**Fig. S5. Cryo-EM of ABC(WT) in a nanodisc.**

A: Representative electron micrograph of vitrified ABC(WT) at 2.0  $\mu\text{m}$  defocus and  $63\text{ e}^{-}/\text{\AA}^2$  total dose acquired with a K2 direct electron detector. Scale bar, 100 nm. B: Representative 2D class averages. Top and tilted views (left two images) and side views (right two images) are shown. Scale bar, 20 nm. C: Fourier shell correlation (FSC) of the obtained cryo-EM map (black curve). The 0.143 criterion indicates an average resolution of 3.4  $\text{\AA}$ . The red and blue curves show the map-to-model FSCs of two independently refined half maps. D: Angular distribution plots of the final round of refinement in side view and top view. Each stick represents a projection view. The size and color of sticks (blue-to-green) is proportional to the number of particles. E: Local resolution estimation of the cryo-EM map, side view (left) and section (right), colored according to local resolution. F: Superimpositions of representative areas of the cryo-EM density maps and the models, shown for an  $\alpha$ -helical part in TcA (left) and a  $\beta$ -strand in TcB (right).

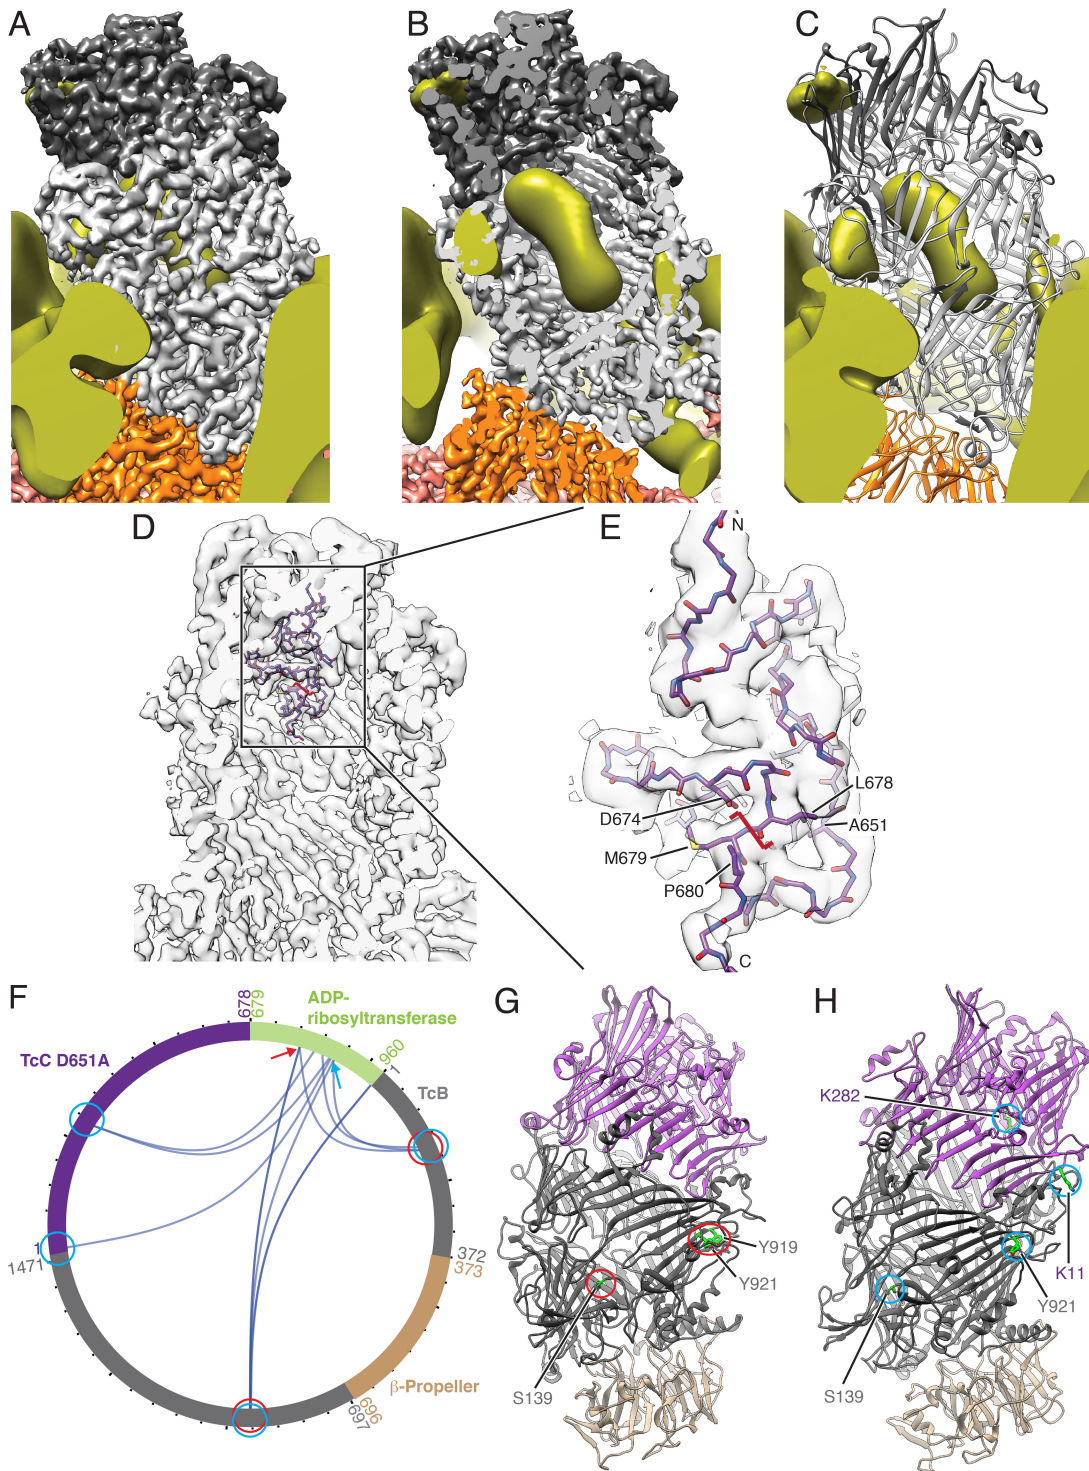

**Fig. S6. Variability analysis of the TcB-TcC cocoon, visualization of the aspartyl protease domain of TcC and XL-MS analysis of ABC(D651A) with encapsulated, non-cleaved toxic enzyme.**

A-C: 3D variability analysis of the ABC(D651A) structure. The 3D average and variance map were created in SPHIRE (6) with the input images filtered to 25 Å. The 3D variance map is shown in gold. A,B: Overlay of the cryo-EM density map of ABC(D651A) (colored in pale red, orange, light

gray and dark gray according to TcA, TcB  $\beta$ -propeller, TcB cocoon and TcC, respectively) and 3D variance map in side view (A) and section (B). C: Model of TcB-TcC with the 3D variance map (gold). Note the highest variance in the center of the cocoon and at the upper domains of TcA. D: Position of the aspartyl autoprotease domain (residues 618 – 678 of TcC) with the attached N-terminus of the toxic enzyme (residues 679 – 683 of TcC) in the TcB-TcC cocoon. The model is overlaid with the cryo-EM map obtained by shifting the center of reconstruction (Fig. S3). The cleavage site is indicated (red bracket). E: Detailed view of panel D. The protein is cleaved between L678 and M679. The residues forming the aspartyl autoprotease cleavage site (D674 and A651, which is D651 in WT) and the conserved P680 are indicated. F: Visualization of crosslinks (dark blue curves) in TcB-TcC-D651A between the TcB-TcC cocoon (gray and violet,  $\beta$ -propeller in sand) and the ADP-ribosyltransferase (green). Two individual positions (K785 and K853, K856, K863 of TcC) and their crosslinks to the TcB-TcC cocoon are indicated with red and blue arrows and circles, respectively. All crosslinks with a score of 50 and higher are shown. The plot was created using xVis (19). A complete list of all crosslinks is shown in Table S3. G,H: The TcB-TcC cocoon with all amino acids that crosslink with K785 indicated and highlighted with red circles (G) and crosslinks with K853, K856, K863 indicated and highlighted with blue circles (H).

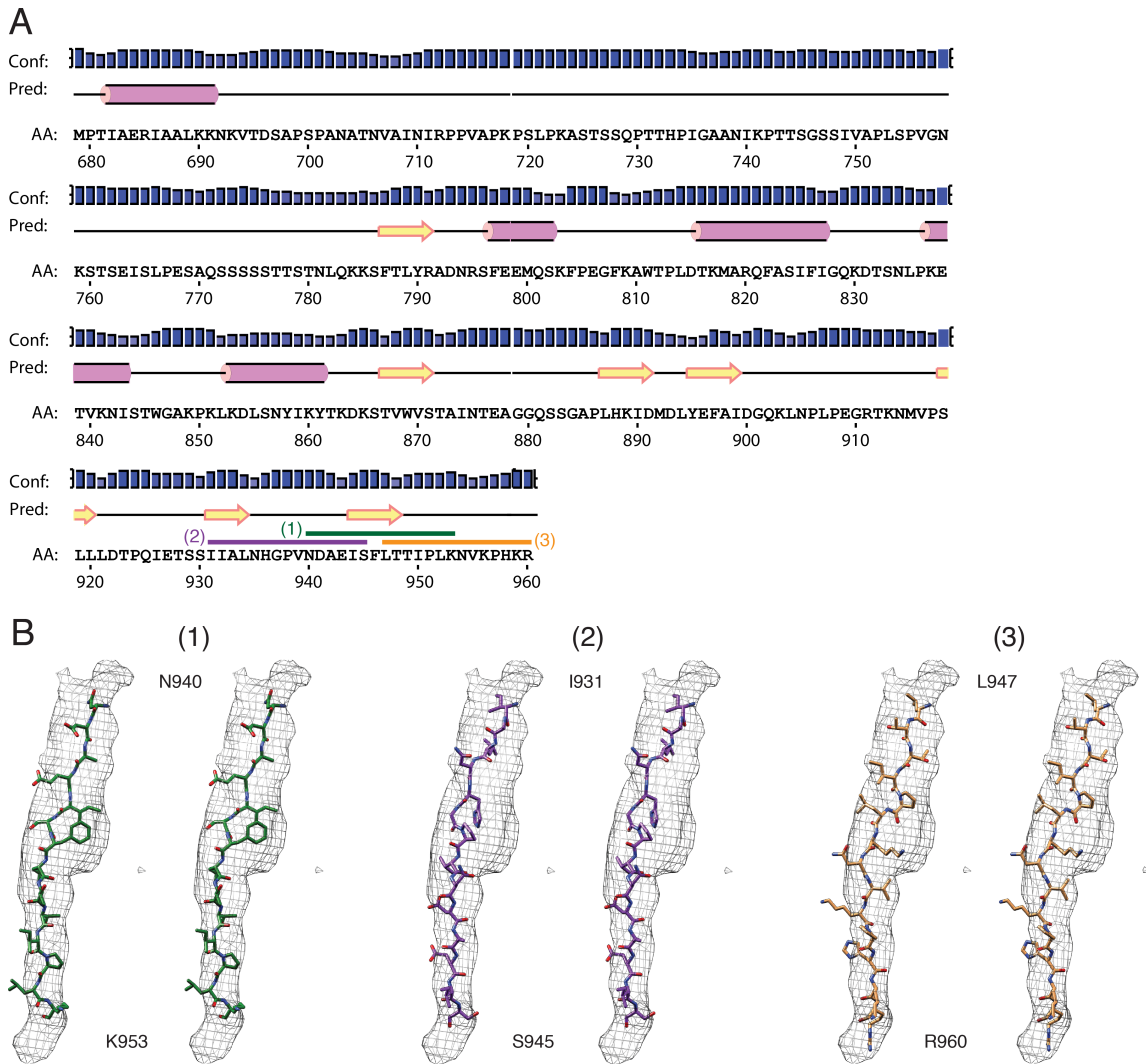

**Fig. S7: Comparison of different models close to the C-terminus of the toxic enzyme in the density in the narrow passage of TcB.**

A: Secondary structure prediction of the ADP-ribosyltransferase of TccC3, obtained by PSIPRED (56). Predicted  $\alpha$ -helices are shown as purple cylinders,  $\beta$ -strands are shown as yellow arrows. The positions of modeled peptides in B are shown as green, purple and orange bars. Residue numbering starts with the first residue after the cleavage site of TcC (M679). Conf: confidence, Pred: prediction, AA: residue. B: Stereo views of three atomic models of possible peptides close to the C-terminus of the ADP-ribosyltransferase in the cryo-EM density (shown as mesh representation) in the narrow passage of TcB. N940 – K953 (green) fits best, with the bulky density in the center occupied by F946.

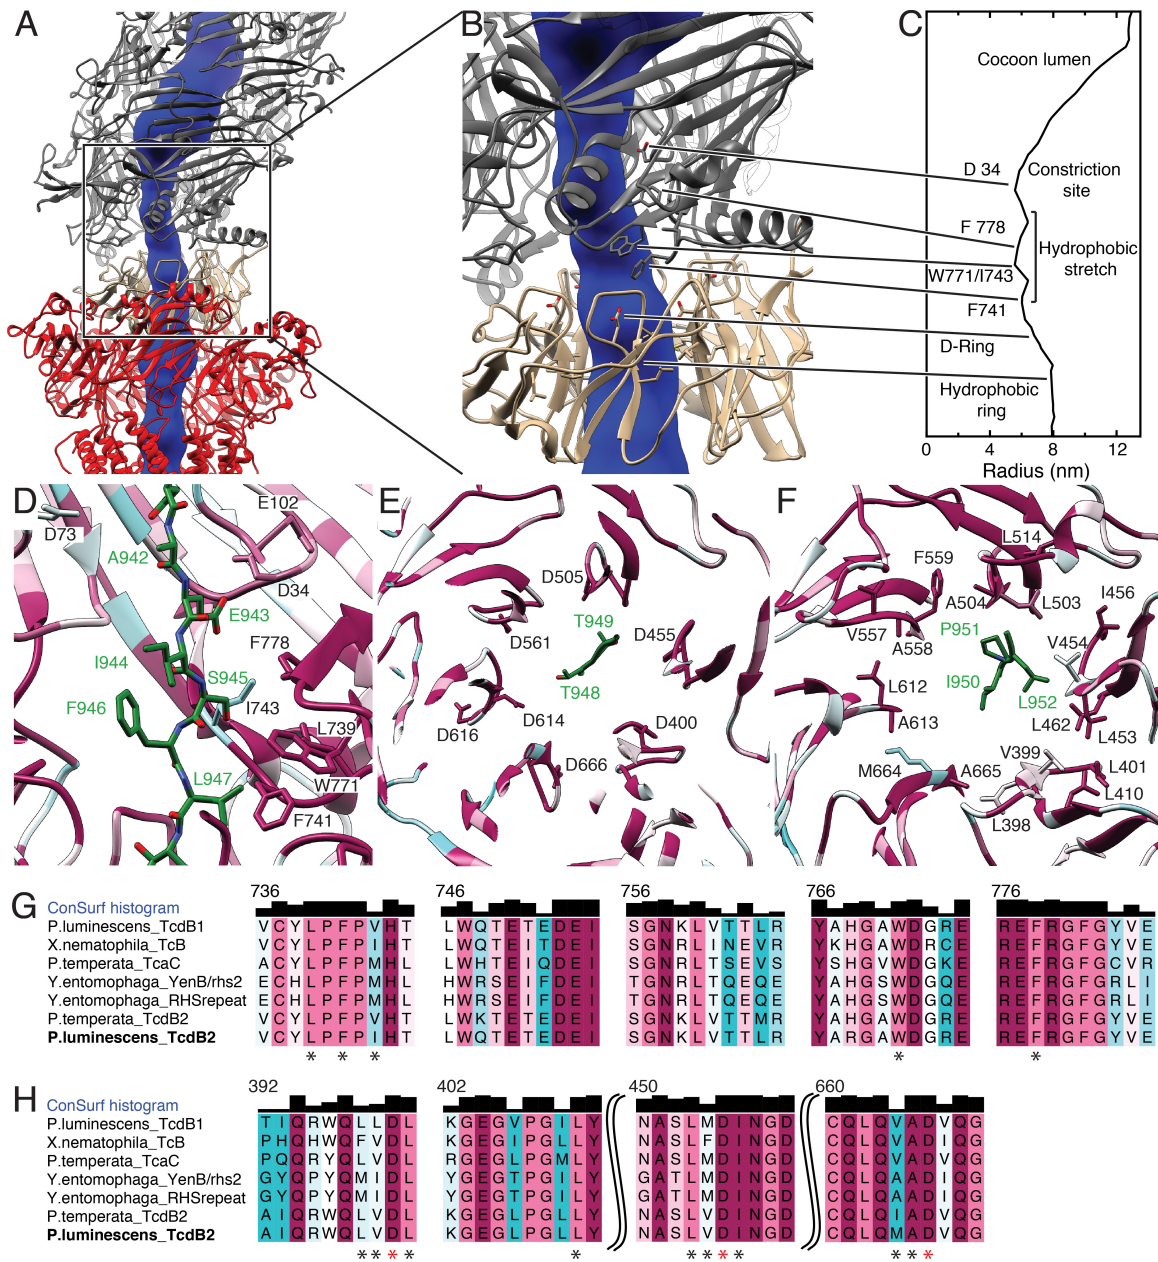

**Fig. S8: Analysis of translocation channel of TcB and conservation plot of residues.**

**A:** The central translocation channel of TcB, spanning from the cocoon (gray) through the TcB  $\beta$ -propeller (sand) to TcA (red). The channel lumen obtained by ChExVis (49) is shown in blue. **B:** Section of panel a, showing constrictions in the TcB  $\beta$ -propeller and cocoon. D34 in the constriction site and residues of the hydrophobic stretch, the D-ring and the hydrophobic ring (see Fig. 6) are shown. **C:** Plot of inner radius of the TcB channel. Residues and motifs forming constrictions are indicated. **D-F:** The constriction site and the hydrophobic stretch (**D**), the negatively charged ring (**E**) and the hydrophobic ring (**F**) with mapped sequence conservation ranging from minimum (cyan) to maximum (magenta). The translocating ADP-ribosyltransferase is depicted in green. Views and highlighted residues are the same like in Fig. 6C-E. **G:** Sequence alignment of the hydrophobic stretch of TcB. Residues shown in panel D are indicated (\*). **H:** Sequence alignment of selected regions of the D-ring and the hydrophobic ring. Residues shown in panels E and F are indicated by red and black asterisks, respectively.

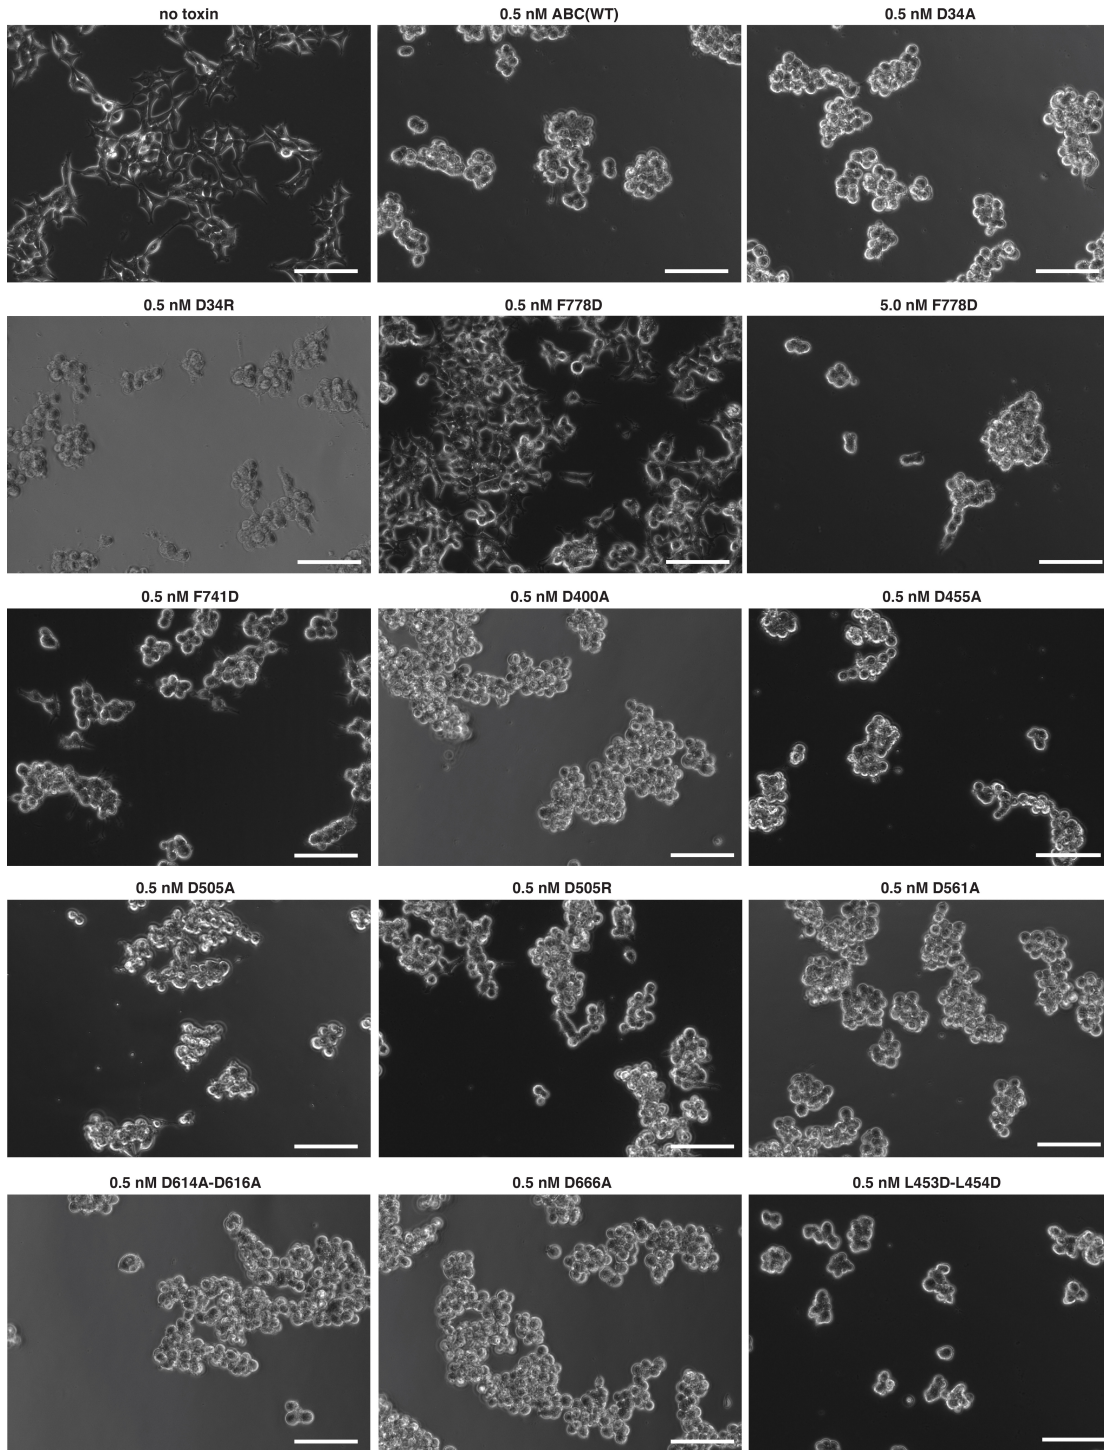

**Fig. S9. Comparison of toxicity of TcB variants.**

Intoxication of HEK 293T cells with holotoxins formed by TcA(WT) and the indicated TcB-TcC variants. Intoxicated cells round up and detach from the surface.  $2 \times 10^4$  cells in DMEM/F12 medium were incubated with 0.5 nM or 5.0 nM of ABC for 16 h at 37 °C before imaging. Experiments were performed in duplicates with qualitatively identical results. Scale bars, 100  $\mu$ m.

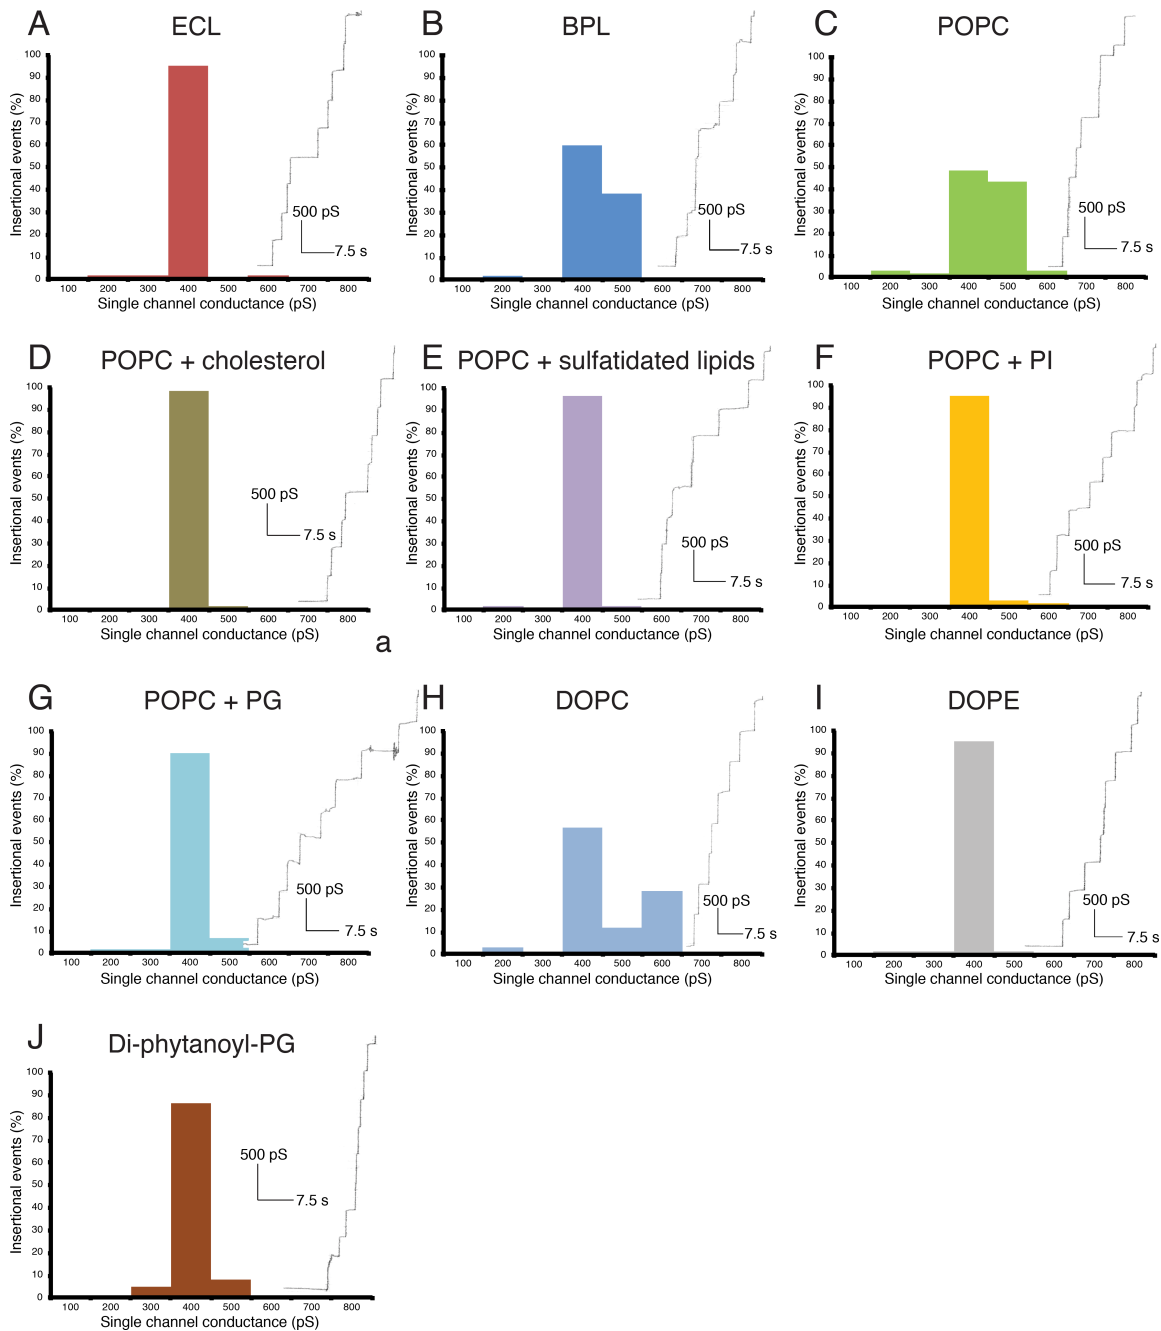

**Fig. S10: Single channel conductance of TcA in different lipids.**

All histograms were constructed from the data of 60 pore insertional events for each condition. For each experiment, an exemplary recording of the single-channel current versus time is shown next to the histogram. A: TcA and *E. coli* polar lipid extract (ECL). B: TcA and brain polar lipid extract (BPL). C: TcA and POPC. D: TcA and POPC with 20% cholesterol. E: TcA and POPC with 20% sulfatide. F: TcA and POPC with 20% liver phosphatidylinositol (PI). G: TcA and POPC with 20% phosphatidylglycerol (PG). H: TcA and di-oleoyl-phosphatidylcholine (DOPC). I: TcA and di-oleoyl-phosphatidylethanolamine (DOPE). J: TcA and di-phytanoyl-phosphatidylglycerol.

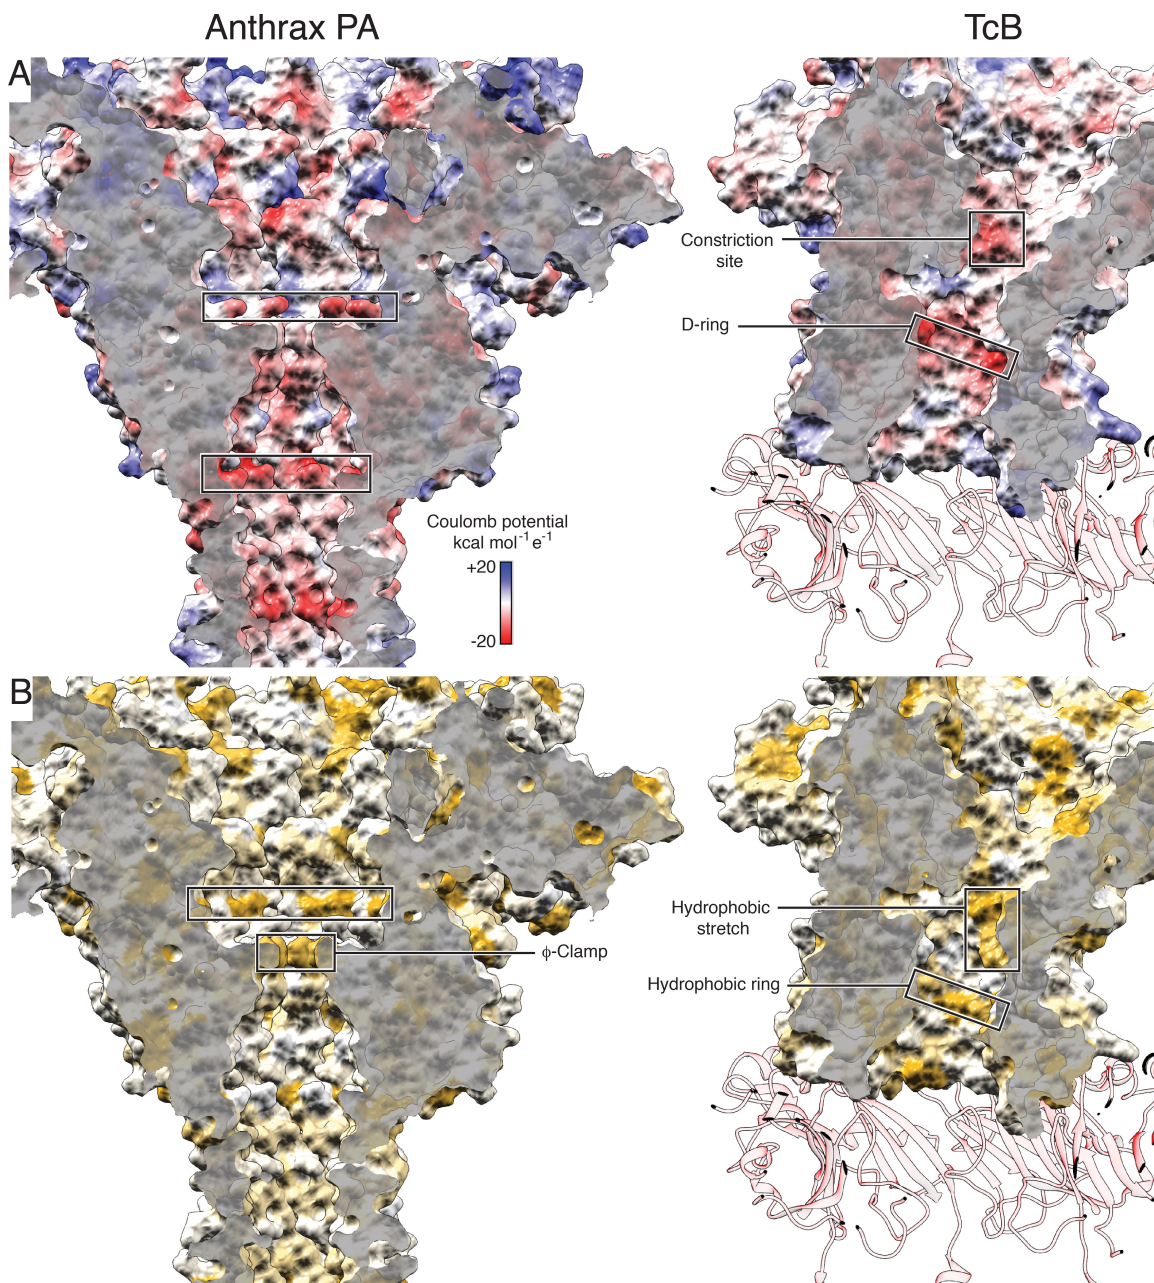

**Fig. S11: Comparison of the Coulomb potentials and surface hydrophobicities of the translocation channels of anthrax protective antigen (PA) with the narrow passage of TcB.**  
 A: Surface representation of anthrax PA (left) and TcB (right), colored according to the Coulomb potential ( $\text{kcal mol}^{-1} \text{e}^{-1}$ ) at pH 7.0. The interacting parts of TcA at the bottom are shown as transparent ribbon representation. The negatively charged regions of both structures close to the channel constrictions are highlighted in boxes. Translocation direction is from top to bottom. B: The same view as in panel A, colored according to hydrophobicity. Hydrophobic regions are colored ochre, non-hydrophobic regions are colored white. Hydrophobic regions inside the channels are highlighted in boxes.



## Legends for Supplementary Movies

### Movie S1 (separate file):

Cryo-EM density map of the ABC(D651A) pore with the fitted atomic model. Representative areas of the cryo-EM density in TcA and TcB-TcC are shown.

### Movie S2 (separate file):

Morph between TcA-A (red) and the other four TcA chains, visualizing the structural changes in the upper part of the  $\alpha$ -helical shell in comparison to the rest of the molecule.

### Movie S3 (separate file):

Move through vertical slices along the central axis of ABC(D651A) and ABC(WT) pore. TcA, TcB and TcC are shown as ribbon representations. The nanodisc is shown in transparent gray. Additional density not corresponding to the atomic models is filtered to 10 Å and shown in dark gray.

### Movie S4 (separate file):

Cryo-EM density map of the ABC(D651A) pore after shifting the center of reconstruction. The atomic model of TcB-TcC (blue and purple, respectively) is fitted into the map. In the second part, the movie zooms in and focuses on the aspartyl protease domain of TcC.

### Movie S5 (separate file):

Cryo-EM density map inside the narrow passage of TcB with the different C-terminal polypeptides of the ADP-ribosyltransferase fitted into the density (Fig. S7B).

### Movie S6 (separate file):

Morph of the cryo-EM density of the ABC(D651A) prepore (EMDB 0150) to the density of the ABC(D651A) pore in a nanodisc. The morph between the densities is followed by a morph between the states using the atomic models of the proteins, showing the prepore-to-pore transition on the level of the holotoxin and the opening of the translocation channel in the membrane. The outer shell, the linker and the transmembrane channel of TcA are shown in red, black and yellow, respectively. TcB is shown in blue, and TcC is shown in purple.

## Supplementary Tables

**Table S1.** Cryo-EM data collection, refinement and validation statistics for ABC(D651A) and ABC(WT).

|                                                  | TcdA1-TcdB2-TccC3-D651A, pore form in nanodiscs (EMDB-10312) (PDB 6SUE) | TcdA1-TcdB2-TccC3 wt, pore form in nanodiscs (EMDB-10313) (PDB 6SUF) |
|--------------------------------------------------|-------------------------------------------------------------------------|----------------------------------------------------------------------|
| <b>Data collection and processing</b>            |                                                                         |                                                                      |
| Camera                                           | Falcon III                                                              | K2                                                                   |
| Magnification                                    | 59,000                                                                  | 130,000                                                              |
| Voltage (kV)                                     | 300                                                                     | 300                                                                  |
| Exposure time (s)                                | 1.5                                                                     | 15                                                                   |
| Total electron exposure (e-/Å <sup>2</sup> )     | 100                                                                     | 61                                                                   |
| Defocus range (µm)                               | 1.2 – 2.6                                                               | 1.4 – 2.6                                                            |
| Pixel size (Å)                                   | 1.11                                                                    | 1.05                                                                 |
| Symmetry imposed                                 | C1                                                                      | C1                                                                   |
| Initial particle images (no.)                    | 619,594                                                                 | 269,142                                                              |
| Final particle images (no.)                      | 337,823                                                                 | 64,806                                                               |
| Map resolution (Å)                               | 3.4                                                                     | 3.4                                                                  |
| FSC threshold                                    | 0.143                                                                   | 0.143                                                                |
| Map resolution range (Å)                         | 2.6-6.8                                                                 | 2.6 – 6.8                                                            |
| Map sharpening <i>B</i> factor (Å <sup>2</sup> ) | -78.09                                                                  | -61.28                                                               |
|                                                  |                                                                         |                                                                      |
|                                                  |                                                                         |                                                                      |
| <b>Refinement</b>                                |                                                                         |                                                                      |
| Initial model used (PDB code)                    | 4O9X, 5LKH, 5LKI                                                        | ABC(D651A)                                                           |
| Model resolution (Å)                             | 3.5                                                                     | 3.4                                                                  |
| FSC threshold                                    | 0.5                                                                     | 0.5                                                                  |
| Model composition                                |                                                                         |                                                                      |
| Non-hydrogen atoms                               | 108,272                                                                 | 108,122                                                              |
| Protein residues                                 | 13,628                                                                  | 13,607                                                               |
| Ligands                                          |                                                                         |                                                                      |
| Mean B factors (Å <sup>2</sup> )                 |                                                                         |                                                                      |
| Protein                                          | 107.3                                                                   | 63.3                                                                 |
| R.m.s. deviations                                |                                                                         |                                                                      |
| Bond lengths (Å)                                 | 0.021                                                                   | 0.021                                                                |
| Bond angles (°)                                  | 1.68                                                                    | 1.77                                                                 |
| Validation                                       |                                                                         |                                                                      |
| MolProbity score                                 | 0.89                                                                    | 1.68                                                                 |
| EMRinger score                                   | 2.68                                                                    | 2.93                                                                 |
| Clashscore                                       | 1.12                                                                    | 1.51                                                                 |
| Favored rotamers (%)                             | 99.57                                                                   | 99.66                                                                |
| Poor rotamers (%)                                | 0.01                                                                    | 0.00                                                                 |
| Rosetta FSC <sub>work</sub> /FSC <sub>free</sub> | 0.6464/0.6355                                                           | 0.6783/0.6595                                                        |
| Ramachandran plot                                |                                                                         |                                                                      |
| Favored (%)                                      | 97.69                                                                   | 97.38                                                                |
| Allowed (%)                                      | 99.72                                                                   | 99.74                                                                |
| Disallowed (%)                                   | 0.28                                                                    | 0.26                                                                 |

**Table S2.** Crosslinks of TcB-TcC(WT) that were detected by mass spectrometry. Crosslinks between the TcB-TcC cocoon and the ADP-ribosyltransferase (HVR) are highlighted in red, and crosslinks between TcB-TcC and HVR with a score of at least 50 that are shown in Fig. 5A are indicated.

| Protein1 | Protein2 | AbsPos1 | AbsPos2 | Score | false discovery rate | Score $\geq$ 50 |
|----------|----------|---------|---------|-------|----------------------|-----------------|
| TcB      | TcB      | 136     | 1395    | 18    | 0.005                |                 |
| TcB      | TcB      | 482     | 520     | 30    | 0                    |                 |
| TcB      | TcB      | 637     | 1302    | 96    | 0                    |                 |
| TcB      | TcB      | 859     | 866     | 104   | 0                    |                 |
| TcB      | TcB      | 872     | 807     | 28    | 0.006                |                 |
| TcB      | TcB      | 919     | 637     | 48    | 0                    |                 |
| TcB      | TcB      | 921     | 1395    | 80    | 0                    |                 |
| TcB      | TcB      | 946     | 846     | 101   | 0                    |                 |
| TcB      | TcB      | 1175    | 402     | 13    | 0.011                |                 |
| TcB      | TcB      | 1177    | 311     | 48    | 0                    |                 |
| TcB      | TcB      | 1177    | 319     | 95    | 0                    |                 |
| TcB      | TcB      | 1177    | 328     | 69    | 0                    |                 |
| TcB      | TcC      | 1177    | 160     | 81    | 0                    |                 |
| TcB      | TcB      | 1278    | 637     | 96    | 0                    |                 |
| TcB      | TcB      | 1278    | 647     | 94    | 0                    |                 |
| TcB      | TcB      | 1278    | 1302    | 92    | 0                    |                 |
| TcB      | TcB      | 1278    | 1304    | 117   | 0                    |                 |
| TcB      | TcB      | 1280    | 1304    | 13    | 0                    |                 |
| TcB      | TcB      | 1304    | 1450    | 13    | 0.011                |                 |
| TcB      | TcC      | 1304    | 655     | 11    | 0.004                |                 |
| TcB      | TcB      | 1417    | 1422    | 99    | 0                    |                 |
| TcB      | TcB      | 1439    | 1477    | 24    | 0.006                |                 |
| TcB      | TcC      | 1439    | 9       | 98    | 0                    |                 |
| TcB      | TcC      | 1439    | 11      | 96    | 0                    |                 |
| TcC      | TcB      | 41      | 1395    | 23    | 0                    |                 |
| TcC      | TcC      | 124     | 142     | 63    | 0                    |                 |
| TcC      | TcB      | 308     | 1422    | 111   | 0                    |                 |
| TcC      | TcB      | 308     | 1425    | 84    | 0                    |                 |
| TcC      | TcB      | 308     | 1428    | 106   | 0                    |                 |
| TcC      | TcC      | 308     | 296     | 86    | 0                    |                 |
| TcC      | TcC      | 308     | 297     | 53    | 0.004                |                 |
| TcC      | TcC      | 308     | 315     | 88    | 0                    |                 |
| TcC      | TcC      | 308     | 316     | 104   | 0                    |                 |
| TcC      | TcB      | 309     | 1422    | 101   | 0                    |                 |
| TcC      | TcC      | 309     | 316     | 49    | 0                    |                 |
| TcC      | TcC      | 313     | 308     | 101   | 0                    |                 |
| TcC      | TcC      | 313     | 348     | 22    | 0.006                |                 |
| TcC      | TcC      | 315     | 348     | 33    | 0                    |                 |
| TcC      | TcC      | 478     | 484     | 35    | 0                    |                 |
| TcC      | TcC      | 481     | 484     | 81    | 0                    |                 |
| TcC      | TcC      | 481     | 493     | 116   | 0                    |                 |
| TcC      | TcC      | 484     | 142     | 45    | 0                    |                 |
| TcC      | TcC      | 484     | 511     | 33    | 0.006                |                 |

|     |     |      |      |     |       |   |
|-----|-----|------|------|-----|-------|---|
| TcC | TcC | 622  | 282  | 38  | 0.007 |   |
| TcC | TcC | 625  | 560  | 79  | 0     |   |
| TcC | TcC | 625  | 618  | 85  | 0     |   |
| TcC | TcC | 625  | 619  | 126 | 0     |   |
| TcB | HVR | 136  | 817  | 44  | 0.007 |   |
| TcB | HVR | 136  | 837  | 47  | 0     |   |
| TcB | HVR | 762  | 817  | 24  | 0.006 |   |
| TcB | HVR | 762  | 837  | 25  | 0.006 |   |
| TcB | HVR | 762  | 849  | 31  | 0.006 |   |
| TcB | HVR | 762  | 853  | 28  | 0.006 |   |
| TcB | HVR | 919  | 785  | 101 | 0     | x |
| TcB | HVR | 921  | 785  | 126 | 0     | x |
| TcB | HVR | 1473 | 882  | 12  | 0     |   |
| TcC | HVR | 622  | 956  | 27  | 0     |   |
| TcC | HVR | 625  | 679  | 58  | 0     | x |
| TcC | HVR | 625  | 785  | 105 | 0     | x |
| HVR | TcC | 679  | 493  | 14  | 0     |   |
| HVR | TcB | 690  | 762  | 22  | 0     |   |
| HVR | TcB | 690  | 763  | 34  | 0.007 |   |
| HVR | TcB | 690  | 766  | 30  | 0.006 |   |
| HVR | TcC | 690  | 273  | 24  | 0     |   |
| HVR | TcC | 690  | 282  | 125 | 0     | x |
| HVR | TcC | 690  | 625  | 147 | 0     | x |
| HVR | TcB | 785  | 136  | 42  | 0.007 |   |
| HVR | TcB | 785  | 139  | 112 | 0     | x |
| HVR | TcB | 785  | 762  | 24  | 0.006 |   |
| HVR | TcB | 785  | 1439 | 7   | 0.004 |   |
| HVR | TcB | 849  | 136  | 39  | 0     |   |
| HVR | TcB | 853  | 139  | 76  | 0     | x |
| HVR | TcB | 863  | 132  | 23  | 0     |   |
| HVR | TcB | 863  | 139  | 108 | 0     | x |
| HVR | TcB | 863  | 762  | 24  | 0.006 |   |
| HVR | TcB | 959  | 132  | 20  | 0     |   |
| HVR | HVR | 679  | 785  | 127 | 0     |   |
| HVR | HVR | 679  | 790  | 100 | 0     |   |
| HVR | HVR | 679  | 803  | 118 | 0     |   |
| HVR | HVR | 679  | 809  | 112 | 0     |   |
| HVR | HVR | 679  | 816  | 99  | 0     |   |
| HVR | HVR | 679  | 817  | 122 | 0     |   |
| HVR | HVR | 679  | 837  | 84  | 0     |   |
| HVR | HVR | 679  | 839  | 119 | 0     |   |
| HVR | HVR | 679  | 849  | 120 | 0     |   |
| HVR | HVR | 679  | 853  | 112 | 0     |   |
| HVR | HVR | 679  | 856  | 54  | 0     |   |
| HVR | HVR | 679  | 860  | 111 | 0     |   |
| HVR | HVR | 679  | 865  | 98  | 0     |   |
| HVR | HVR | 679  | 903  | 92  | 0     |   |
| HVR | HVR | 690  | 679  | 125 | 0     |   |

|     |     |     |     |     |   |
|-----|-----|-----|-----|-----|---|
| HVR | HVR | 690 | 681 | 127 | 0 |
| HVR | HVR | 690 | 785 | 153 | 0 |
| HVR | HVR | 690 | 790 | 137 | 0 |
| HVR | HVR | 690 | 802 | 124 | 0 |
| HVR | HVR | 690 | 803 | 113 | 0 |
| HVR | HVR | 690 | 809 | 114 | 0 |
| HVR | HVR | 690 | 816 | 119 | 0 |
| HVR | HVR | 690 | 830 | 117 | 0 |
| HVR | HVR | 690 | 837 | 133 | 0 |
| HVR | HVR | 690 | 839 | 144 | 0 |
| HVR | HVR | 690 | 849 | 129 | 0 |
| HVR | HVR | 690 | 853 | 125 | 0 |
| HVR | HVR | 690 | 858 | 102 | 0 |
| HVR | HVR | 690 | 860 | 126 | 0 |
| HVR | HVR | 690 | 863 | 143 | 0 |
| HVR | HVR | 690 | 865 | 103 | 0 |
| HVR | HVR | 690 | 882 | 47  | 0 |
| HVR | HVR | 690 | 903 | 115 | 0 |
| HVR | HVR | 690 | 959 | 131 | 0 |
| HVR | HVR | 785 | 796 | 33  | 0 |
| HVR | HVR | 785 | 802 | 126 | 0 |
| HVR | HVR | 785 | 803 | 126 | 0 |
| HVR | HVR | 785 | 809 | 115 | 0 |
| HVR | HVR | 785 | 817 | 134 | 0 |
| HVR | HVR | 785 | 830 | 126 | 0 |
| HVR | HVR | 785 | 837 | 119 | 0 |
| HVR | HVR | 785 | 849 | 127 | 0 |
| HVR | HVR | 785 | 853 | 139 | 0 |
| HVR | HVR | 785 | 865 | 113 | 0 |
| HVR | HVR | 786 | 817 | 126 | 0 |
| HVR | HVR | 786 | 853 | 110 | 0 |
| HVR | HVR | 788 | 837 | 99  | 0 |
| HVR | HVR | 788 | 853 | 22  | 0 |
| HVR | HVR | 788 | 865 | 91  | 0 |
| HVR | HVR | 790 | 803 | 122 | 0 |
| HVR | HVR | 802 | 784 | 33  | 0 |
| HVR | HVR | 802 | 830 | 35  | 0 |
| HVR | HVR | 802 | 853 | 50  | 0 |
| HVR | HVR | 803 | 718 | 83  | 0 |
| HVR | HVR | 803 | 830 | 113 | 0 |
| HVR | HVR | 809 | 830 | 115 | 0 |
| HVR | HVR | 809 | 865 | 92  | 0 |
| HVR | HVR | 809 | 883 | 67  | 0 |
| HVR | HVR | 816 | 741 | 40  | 0 |
| HVR | HVR | 816 | 784 | 67  | 0 |
| HVR | HVR | 816 | 803 | 112 | 0 |
| HVR | HVR | 816 | 830 | 114 | 0 |
| HVR | HVR | 816 | 865 | 72  | 0 |

|     |     |     |     |     |       |
|-----|-----|-----|-----|-----|-------|
| HVR | HVR | 817 | 741 | 94  | 0     |
| HVR | HVR | 817 | 803 | 142 | 0     |
| HVR | HVR | 817 | 830 | 128 | 0     |
| HVR | HVR | 817 | 832 | 109 | 0     |
| HVR | HVR | 830 | 784 | 107 | 0     |
| HVR | HVR | 833 | 853 | 84  | 0     |
| HVR | HVR | 837 | 803 | 119 | 0     |
| HVR | HVR | 837 | 809 | 120 | 0     |
| HVR | HVR | 837 | 816 | 105 | 0     |
| HVR | HVR | 837 | 817 | 122 | 0     |
| HVR | HVR | 837 | 860 | 110 | 0     |
| HVR | HVR | 837 | 862 | 117 | 0     |
| HVR | HVR | 837 | 871 | 77  | 0     |
| HVR | HVR | 837 | 872 | 33  | 0     |
| HVR | HVR | 839 | 803 | 108 | 0     |
| HVR | HVR | 839 | 817 | 96  | 0     |
| HVR | HVR | 844 | 865 | 8   | 0     |
| HVR | HVR | 849 | 796 | 26  | 0     |
| HVR | HVR | 849 | 802 | 104 | 0     |
| HVR | HVR | 849 | 803 | 116 | 0     |
| HVR | HVR | 849 | 809 | 116 | 0     |
| HVR | HVR | 849 | 816 | 75  | 0     |
| HVR | HVR | 849 | 817 | 36  | 0.007 |
| HVR | HVR | 849 | 830 | 121 | 0     |
| HVR | HVR | 849 | 837 | 125 | 0     |
| HVR | HVR | 849 | 839 | 126 | 0     |
| HVR | HVR | 849 | 860 | 117 | 0     |
| HVR | HVR | 849 | 865 | 76  | 0     |
| HVR | HVR | 853 | 803 | 84  | 0     |
| HVR | HVR | 853 | 809 | 121 | 0     |
| HVR | HVR | 853 | 812 | 12  | 0.011 |
| HVR | HVR | 853 | 816 | 135 | 0     |
| HVR | HVR | 853 | 817 | 74  | 0     |
| HVR | HVR | 853 | 830 | 118 | 0     |
| HVR | HVR | 853 | 837 | 102 | 0     |
| HVR | HVR | 853 | 839 | 27  | 0     |
| HVR | HVR | 853 | 849 | 140 | 0     |
| HVR | HVR | 853 | 858 | 72  | 0     |
| HVR | HVR | 853 | 865 | 110 | 0     |
| HVR | HVR | 856 | 718 | 91  | 0     |
| HVR | HVR | 856 | 785 | 108 | 0     |
| HVR | HVR | 856 | 803 | 120 | 0     |
| HVR | HVR | 856 | 849 | 124 | 0     |
| HVR | HVR | 858 | 785 | 117 | 0     |
| HVR | HVR | 858 | 803 | 102 | 0     |
| HVR | HVR | 858 | 837 | 115 | 0     |
| HVR | HVR | 858 | 849 | 112 | 0     |
| HVR | HVR | 860 | 803 | 130 | 0     |

|     |     |     |     |     |   |
|-----|-----|-----|-----|-----|---|
| HVR | HVR | 860 | 809 | 121 | 0 |
| HVR | HVR | 860 | 812 | 111 | 0 |
| HVR | HVR | 860 | 816 | 121 | 0 |
| HVR | HVR | 860 | 817 | 135 | 0 |
| HVR | HVR | 860 | 833 | 60  | 0 |
| HVR | HVR | 862 | 785 | 50  | 0 |
| HVR | HVR | 862 | 803 | 124 | 0 |
| HVR | HVR | 863 | 679 | 91  | 0 |
| HVR | HVR | 863 | 718 | 43  | 0 |
| HVR | HVR | 863 | 785 | 121 | 0 |
| HVR | HVR | 863 | 802 | 100 | 0 |
| HVR | HVR | 863 | 803 | 107 | 0 |
| HVR | HVR | 863 | 809 | 105 | 0 |
| HVR | HVR | 863 | 837 | 117 | 0 |
| HVR | HVR | 863 | 839 | 117 | 0 |
| HVR | HVR | 863 | 849 | 135 | 0 |
| HVR | HVR | 863 | 853 | 147 | 0 |
| HVR | HVR | 863 | 856 | 51  | 0 |
| HVR | HVR | 863 | 858 | 127 | 0 |
| HVR | HVR | 863 | 882 | 29  | 0 |
| HVR | HVR | 863 | 903 | 114 | 0 |
| HVR | HVR | 863 | 956 | 143 | 0 |
| HVR | HVR | 956 | 785 | 113 | 0 |
| HVR | HVR | 956 | 803 | 27  | 0 |
| HVR | HVR | 956 | 816 | 47  | 0 |
| HVR | HVR | 956 | 837 | 57  | 0 |
| HVR | HVR | 956 | 849 | 48  | 0 |
| HVR | HVR | 956 | 860 | 39  | 0 |
| HVR | HVR | 959 | 853 | 86  | 0 |

**Table S3.** Crosslinks of TcB-TcC(D651A) that were detected by mass spectrometry. Crosslinks between the TcB-TcC cocoon and the ADP-ribosyltransferase (HVR) are highlighted in red, and crosslinks between TcB-TcC and HVR with a score of at least 50 that are shown in Fig. S6F are indicated.

| Protein1 | Protein2 | AbsPos1 | AbsPos2 | Score | false discovery rate | Score $\geq$ 50 |
|----------|----------|---------|---------|-------|----------------------|-----------------|
| TcB      | TcB      | 1278    | 1278    | 133   | 0.000                |                 |
| TcC      | TcC      | 313     | 308     | 132   | 0.000                |                 |
| TcB      | TcB      | 534     | 525     | 130   | 0.000                |                 |
| TcB      | TcB      | 1439    | 1470    | 122   | 0.000                |                 |
| TcB      | TcB      | 534     | 474     | 117   | 0.000                |                 |
| TcB      | TcB      | 921     | 1395    | 112   | 0.000                |                 |
| TcB      | TcB      | 520     | 521     | 111   | 0.000                |                 |
| TcB      | TcB      | 1278    | 1304    | 109   | 0.000                |                 |
| TcB      | TcB      | 1177    | 319     | 108   | 0.000                |                 |
| TcB      | TcB      | 1442    | 1470    | 107   | 0.000                |                 |
| TcB      | TcB      | 1439    | 1473    | 105   | 0.000                |                 |
| TcB      | TcB      | 859     | 866     | 102   | 0.000                |                 |
| TcC      | TcC      | 618     | 144     | 102   | 0.000                |                 |
| TcB      | TcB      | 946     | 840     | 100   | 0.000                |                 |
| TcC      | TcB      | 7       | 1477    | 99    | 0.000                |                 |
| TcC      | TcB      | 308     | 1428    | 99    | 0.000                |                 |
| TcC      | TcC      | 142     | 156     | 99    | 0.000                |                 |
| TcC      | TcB      | 9       | 970     | 97    | 0.000                |                 |
| TcB      | TcB      | 1278    | 521     | 94    | 0.000                |                 |
| TcB      | TcB      | 1177    | 320     | 92    | 0.000                |                 |
| TcC      | TcB      | 308     | 1431    | 92    | 0.000                |                 |
| TcB      | TcC      | 1439    | 11      | 91    | 0.000                |                 |
| TcB      | TcC      | 1278    | 144     | 91    | 0.000                |                 |
| TcC      | TcB      | 308     | 1425    | 90    | 0.000                |                 |
| TcB      | TcB      | 1278    | 268     | 90    | 0.000                |                 |
| TcB      | TcB      | 402     | 521     | 90    | 0.000                |                 |
| TcB      | TcB      | 946     | 846     | 89    | 0.000                |                 |
| TcB      | TcB      | 1278    | 496     | 87    | 0.000                |                 |
| TcC      | TcC      | 481     | 484     | 85    | 0.000                |                 |
| TcB      | TcC      | 1177    | 160     | 84    | 0.000                |                 |
| TcB      | TcC      | 1278    | 562     | 84    | 0.000                |                 |
| TcB      | TcC      | 1439    | 9       | 82    | 0.000                |                 |
| TcB      | TcB      | 411     | 520     | 82    | 0.000                |                 |
| TcB      | TcB      | 1278    | 883     | 82    | 0.000                |                 |
| TcB      | TcB      | 952     | 846     | 82    | 0.000                |                 |
| TcC      | TcC      | 484     | 144     | 81    | 0.000                |                 |
| TcC      | TcB      | 484     | 1278    | 81    | 0.000                |                 |
| TcC      | TcC      | 504     | 625     | 80    | 0.000                |                 |
| TcB      | TcB      | 1278    | 272     | 79    | 0.000                |                 |
| TcB      | TcB      | 536     | 521     | 76    | 0.000                |                 |
| TcB      | TcB      | 1278    | 1302    | 76    | 0.000                |                 |
| TcC      | TcC      | 618     | 625     | 75    | 0.000                |                 |
| TcB      | TcB      | 866     | 840     | 75    | 0.000                |                 |



|     |     |      |      |    |       |
|-----|-----|------|------|----|-------|
| TcB | TcB | 534  | 476  | 74 | 0.000 |
| TcB | TcB | 1177 | 311  | 71 | 0.000 |
| TcC | TcC | 309  | 316  | 70 | 0.000 |
| TcB | TcC | 1278 | 142  | 68 | 0.000 |
| TcC | TcC | 625  | 504  | 61 | 0.000 |
| TcB | TcB | 866  | 880  | 56 | 0.000 |
| TcC | TcC | 625  | 618  | 56 | 0.000 |
| TcB | TcB | 1278 | 1267 | 54 | 0.000 |
| TcB | TcB | 1177 | 331  | 51 | 0.000 |
| TcB | TcB | 1178 | 320  | 47 | 0.000 |
| TcC | TcC | 625  | 619  | 45 | 0.000 |
| TcB | TcB | 921  | 1278 | 44 | 0.000 |
| TcC | TcB | 493  | 1278 | 37 | 0.000 |
| TcB | TcB | 921  | 846  | 37 | 0.000 |
| TcC | TcB | 484  | 1280 | 36 | 0.000 |
| TcC | TcB | 309  | 1422 | 36 | 0.000 |
| TcC | TcB | 11   | 966  | 35 | 0.000 |
| TcC | TcC | 12   | 504  | 34 | 0.000 |
| TcC | TcC | 496  | 484  | 32 | 0.000 |
| TcB | TcB | 866  | 846  | 31 | 0.000 |
| TcB | TcB | 949  | 846  | 31 | 0.000 |
| TcB | TcB | 916  | 883  | 30 | 0.001 |
| TcC | TcC | 313  | 348  | 30 | 0.001 |
| TcC | TcC | 308  | 301  | 28 | 0.001 |
| TcC | TcC | 625  | 484  | 28 | 0.001 |
| TcC | TcC | 481  | 493  | 28 | 0.001 |
| TcC | TcB | 11   | 970  | 26 | 0.001 |
| TcB | TcB | 766  | 320  | 25 | 0.002 |
| TcC | TcC | 623  | 484  | 21 | 0.003 |
| TcB | TcB | 476  | 883  | 20 | 0.003 |
| TcB | TcC | 268  | 11   | 20 | 0.003 |
| TcC | TcB | 313  | 1422 | 19 | 0.004 |
| TcC | TcC | 308  | 313  | 19 | 0.004 |
| TcB | TcB | 534  | 482  | 18 | 0.005 |
| TcB | TcB | 520  | 902  | 13 | 0.013 |
| TcC | TcC | 484  | 496  | 13 | 0.013 |
| TcC | TcC | 504  | 484  | 13 | 0.013 |
| TcB | TcC | 1177 | 323  | 13 | 0.013 |
| TcB | TcC | 1280 | 484  | 12 | 0.014 |
| TcB | TcB | 1177 | 419  | 12 | 0.014 |
| TcB | TcB | 520  | 1133 | 11 | 0.018 |
| TcB | TcB | 1177 | 158  | 11 | 0.018 |
| TcC | TcB | 313  | 1278 | 10 | 0.020 |
| TcB | TcB | 1280 | 272  | 10 | 0.020 |
| TcB | TcB | 1177 | 991  | 9  | 0.023 |
| TcC | TcB | 671  | 846  | 8  | 0.028 |
| TcB | TcC | 859  | 160  | 7  | 0.033 |
| TcC | TcB | 308  | 482  | 7  | 0.033 |

|     |     |      |      |     |       |   |
|-----|-----|------|------|-----|-------|---|
| TcB | TcB | 1425 | 520  | 7   | 0.033 |   |
| TcB | TcC | 1278 | 277  | 6   | 0.037 |   |
| TcB | TcB | 534  | 872  | 6   | 0.037 |   |
| TcB | TcB | 345  | 414  | 5   | 0.044 |   |
| TcB | TcB | 1214 | 1051 | 5   | 0.044 |   |
| HVR | TcB | 863  | 921  | 106 | 0.000 | x |
| HVR | TcB | 785  | 139  | 86  | 0.000 | x |
| HVR | TcC | 856  | 11   | 80  | 0.000 | x |
| HVR | TcC | 853  | 282  | 79  | 0.000 | x |
| HVR | TcB | 959  | 919  | 76  | 0.000 | x |
| HVR | TcC | 817  | 282  | 66  | 0.000 | x |
| HVR | TcB | 959  | 921  | 53  | 0.000 | x |
| HVR | TcB | 863  | 139  | 50  | 0.000 | x |
| HVR | TcB | 785  | 136  | 38  | 0.000 |   |
| HVR | TcB | 853  | 136  | 35  | 0.000 |   |
| HVR | TcB | 853  | 139  | 30  | 0.001 |   |
| HVR | TcB | 809  | 1296 | 27  | 0.001 |   |
| HVR | TcC | 959  | 410  | 26  | 0.001 |   |
| HVR | TcB | 849  | 136  | 25  | 0.002 |   |
| HVR | TcB | 785  | 143  | 24  | 0.002 |   |
| HVR | TcB | 691  | 1425 | 23  | 0.003 |   |
| HVR | TcB | 863  | 136  | 23  | 0.003 |   |
| HVR | TcB | 863  | 132  | 22  | 0.003 |   |
| HVR | TcB | 786  | 272  | 22  | 0.003 |   |
| HVR | TcC | 690  | 277  | 20  | 0.003 |   |
| HVR | TcB | 837  | 143  | 20  | 0.003 |   |
| HVR | TcB | 959  | 143  | 14  | 0.012 |   |
| HVR | TcC | 837  | 7    | 10  | 0.020 |   |
| HVR | TcB | 853  | 1286 | 10  | 0.020 |   |
| HVR | TcB | 839  | 272  | 9   | 0.023 |   |
| TcB | HVR | 919  | 785  | 104 | 0.000 | x |
| TcB | HVR | 921  | 785  | 103 | 0.000 | x |
| TcB | HVR | 132  | 837  | 53  | 0.000 | x |
| TcB | HVR | 136  | 837  | 42  | 0.000 |   |
| TcB | HVR | 921  | 817  | 38  | 0.000 |   |
| TcC | HVR | 625  | 959  | 35  | 0.000 |   |
| TcB | HVR | 139  | 817  | 24  | 0.002 |   |
| TcC | HVR | 147  | 860  | 19  | 0.004 |   |
| TcB | HVR | 139  | 837  | 13  | 0.013 |   |
| TcB | HVR | 520  | 754  | 12  | 0.014 |   |
| TcB | HVR | 1392 | 809  | 9   | 0.023 |   |
| TcB | HVR | 1280 | 817  | 5   | 0.044 |   |
| HVR | HVR | 690  | 863  | 177 | 0.000 |   |
| HVR | HVR | 690  | 837  | 175 | 0.000 |   |
| HVR | HVR | 863  | 849  | 173 | 0.000 |   |
| HVR | HVR | 863  | 785  | 173 | 0.000 |   |
| HVR | HVR | 690  | 853  | 166 | 0.000 |   |
| HVR | HVR | 863  | 853  | 164 | 0.000 |   |

|     |     |     |     |     |       |
|-----|-----|-----|-----|-----|-------|
| HVR | HVR | 837 | 862 | 162 | 0.000 |
| HVR | HVR | 849 | 837 | 162 | 0.000 |
| HVR | HVR | 956 | 862 | 161 | 0.000 |
| HVR | HVR | 956 | 860 | 161 | 0.000 |
| HVR | HVR | 863 | 856 | 161 | 0.000 |
| HVR | HVR | 837 | 860 | 161 | 0.000 |
| HVR | HVR | 860 | 817 | 161 | 0.000 |
| HVR | HVR | 863 | 959 | 160 | 0.000 |
| HVR | HVR | 690 | 785 | 156 | 0.000 |
| HVR | HVR | 690 | 959 | 156 | 0.000 |
| HVR | HVR | 863 | 816 | 156 | 0.000 |
| HVR | HVR | 785 | 853 | 156 | 0.000 |
| HVR | HVR | 849 | 817 | 155 | 0.000 |
| HVR | HVR | 690 | 816 | 153 | 0.000 |
| HVR | HVR | 853 | 849 | 150 | 0.000 |
| HVR | HVR | 863 | 956 | 149 | 0.000 |
| HVR | HVR | 959 | 862 | 148 | 0.000 |
| HVR | HVR | 863 | 830 | 148 | 0.000 |
| HVR | HVR | 959 | 785 | 148 | 0.000 |
| HVR | HVR | 785 | 839 | 146 | 0.000 |
| HVR | HVR | 785 | 860 | 146 | 0.000 |
| HVR | HVR | 790 | 837 | 146 | 0.000 |
| HVR | HVR | 959 | 853 | 143 | 0.000 |
| HVR | HVR | 959 | 849 | 143 | 0.000 |
| HVR | HVR | 690 | 862 | 142 | 0.000 |
| HVR | HVR | 817 | 849 | 142 | 0.000 |
| HVR | HVR | 959 | 839 | 142 | 0.000 |
| HVR | HVR | 853 | 816 | 142 | 0.000 |
| HVR | HVR | 849 | 839 | 141 | 0.000 |
| HVR | HVR | 863 | 839 | 141 | 0.000 |
| HVR | HVR | 849 | 862 | 138 | 0.000 |
| HVR | HVR | 858 | 849 | 138 | 0.000 |
| HVR | HVR | 863 | 858 | 137 | 0.000 |
| HVR | HVR | 863 | 803 | 136 | 0.000 |
| HVR | HVR | 853 | 817 | 136 | 0.000 |
| HVR | HVR | 853 | 837 | 136 | 0.000 |
| HVR | HVR | 785 | 849 | 133 | 0.000 |
| HVR | HVR | 786 | 837 | 132 | 0.000 |
| HVR | HVR | 817 | 833 | 132 | 0.000 |
| HVR | HVR | 785 | 830 | 132 | 0.000 |
| HVR | HVR | 690 | 839 | 131 | 0.000 |
| HVR | HVR | 849 | 809 | 130 | 0.000 |
| HVR | HVR | 785 | 809 | 129 | 0.000 |
| HVR | HVR | 853 | 809 | 129 | 0.000 |
| HVR | HVR | 690 | 803 | 128 | 0.000 |
| HVR | HVR | 837 | 809 | 127 | 0.000 |
| HVR | HVR | 959 | 830 | 126 | 0.000 |
| HVR | HVR | 860 | 833 | 126 | 0.000 |

|     |     |     |     |     |       |
|-----|-----|-----|-----|-----|-------|
| HVR | HVR | 849 | 803 | 125 | 0.000 |
| HVR | HVR | 785 | 817 | 124 | 0.000 |
| HVR | HVR | 860 | 803 | 124 | 0.000 |
| HVR | HVR | 690 | 833 | 123 | 0.000 |
| HVR | HVR | 690 | 817 | 123 | 0.000 |
| HVR | HVR | 959 | 837 | 123 | 0.000 |
| HVR | HVR | 860 | 865 | 123 | 0.000 |
| HVR | HVR | 860 | 841 | 123 | 0.000 |
| HVR | HVR | 849 | 833 | 123 | 0.000 |
| HVR | HVR | 849 | 860 | 122 | 0.000 |
| HVR | HVR | 862 | 865 | 122 | 0.000 |
| HVR | HVR | 837 | 817 | 122 | 0.000 |
| HVR | HVR | 959 | 809 | 121 | 0.000 |
| HVR | HVR | 959 | 803 | 121 | 0.000 |
| HVR | HVR | 785 | 833 | 121 | 0.000 |
| HVR | HVR | 790 | 803 | 121 | 0.000 |
| HVR | HVR | 860 | 812 | 121 | 0.000 |
| HVR | HVR | 817 | 803 | 121 | 0.000 |
| HVR | HVR | 785 | 803 | 120 | 0.000 |
| HVR | HVR | 785 | 832 | 120 | 0.000 |
| HVR | HVR | 856 | 809 | 119 | 0.000 |
| HVR | HVR | 853 | 803 | 119 | 0.000 |
| HVR | HVR | 690 | 849 | 118 | 0.000 |
| HVR | HVR | 833 | 959 | 118 | 0.000 |
| HVR | HVR | 785 | 865 | 118 | 0.000 |
| HVR | HVR | 853 | 839 | 118 | 0.000 |
| HVR | HVR | 839 | 817 | 0   | 0.000 |
| HVR | HVR | 837 | 803 | 116 | 0.000 |
| HVR | HVR | 785 | 862 | 116 | 0.000 |
| HVR | HVR | 863 | 833 | 115 | 0.000 |
| HVR | HVR | 837 | 812 | 110 | 0.000 |
| HVR | HVR | 860 | 809 | 109 | 0.000 |
| HVR | HVR | 785 | 816 | 108 | 0.000 |
| HVR | HVR | 824 | 817 | 108 | 0.000 |
| HVR | HVR | 858 | 830 | 107 | 0.000 |
| HVR | HVR | 817 | 832 | 107 | 0.000 |
| HVR | HVR | 856 | 803 | 107 | 0.000 |
| HVR | HVR | 817 | 830 | 107 | 0.000 |
| HVR | HVR | 849 | 867 | 105 | 0.000 |
| HVR | HVR | 790 | 741 | 105 | 0.000 |
| HVR | HVR | 817 | 865 | 105 | 0.000 |
| HVR | HVR | 862 | 803 | 105 | 0.000 |
| HVR | HVR | 837 | 816 | 104 | 0.000 |
| HVR | HVR | 853 | 833 | 103 | 0.000 |
| HVR | HVR | 785 | 845 | 102 | 0.000 |
| HVR | HVR | 837 | 883 | 102 | 0.000 |
| HVR | HVR | 858 | 785 | 102 | 0.000 |
| HVR | HVR | 830 | 802 | 101 | 0.000 |

|     |     |     |     |    |       |
|-----|-----|-----|-----|----|-------|
| HVR | HVR | 849 | 830 | 98 | 0.000 |
| HVR | HVR | 862 | 809 | 98 | 0.000 |
| HVR | HVR | 786 | 809 | 98 | 0.000 |
| HVR | HVR | 803 | 833 | 97 | 0.000 |
| HVR | HVR | 863 | 809 | 96 | 0.000 |
| HVR | HVR | 839 | 803 | 95 | 0.000 |
| HVR | HVR | 690 | 809 | 94 | 0.000 |
| HVR | HVR | 785 | 903 | 94 | 0.000 |
| HVR | HVR | 849 | 903 | 94 | 0.000 |
| HVR | HVR | 690 | 860 | 94 | 0.000 |
| HVR | HVR | 785 | 802 | 93 | 0.000 |
| HVR | HVR | 830 | 903 | 91 | 0.000 |
| HVR | HVR | 903 | 769 | 91 | 0.000 |
| HVR | HVR | 802 | 809 | 91 | 0.000 |
| HVR | HVR | 803 | 784 | 91 | 0.000 |
| HVR | HVR | 959 | 865 | 89 | 0.000 |
| HVR | HVR | 839 | 865 | 88 | 0.000 |
| HVR | HVR | 863 | 788 | 88 | 0.000 |
| HVR | HVR | 841 | 833 | 88 | 0.000 |
| HVR | HVR | 903 | 778 | 87 | 0.000 |
| HVR | HVR | 959 | 802 | 87 | 0.000 |
| HVR | HVR | 809 | 833 | 87 | 0.000 |
| HVR | HVR | 816 | 903 | 87 | 0.000 |
| HVR | HVR | 956 | 817 | 86 | 0.000 |
| HVR | HVR | 785 | 837 | 86 | 0.000 |
| HVR | HVR | 959 | 841 | 86 | 0.000 |
| HVR | HVR | 837 | 895 | 83 | 0.000 |
| HVR | HVR | 856 | 849 | 83 | 0.000 |
| HVR | HVR | 830 | 732 | 83 | 0.000 |
| HVR | HVR | 956 | 816 | 82 | 0.000 |
| HVR | HVR | 861 | 809 | 80 | 0.000 |
| HVR | HVR | 830 | 803 | 80 | 0.000 |
| HVR | HVR | 839 | 851 | 77 | 0.000 |
| HVR | HVR | 956 | 785 | 77 | 0.000 |
| HVR | HVR | 863 | 837 | 76 | 0.000 |
| HVR | HVR | 788 | 817 | 75 | 0.000 |
| HVR | HVR | 883 | 784 | 74 | 0.000 |
| HVR | HVR | 785 | 858 | 73 | 0.000 |
| HVR | HVR | 833 | 784 | 71 | 0.000 |
| HVR | HVR | 959 | 889 | 71 | 0.000 |
| HVR | HVR | 853 | 741 | 67 | 0.000 |
| HVR | HVR | 903 | 784 | 66 | 0.000 |
| HVR | HVR | 956 | 833 | 61 | 0.000 |
| HVR | HVR | 903 | 867 | 61 | 0.000 |
| HVR | HVR | 785 | 812 | 61 | 0.000 |
| HVR | HVR | 809 | 732 | 61 | 0.000 |
| HVR | HVR | 786 | 903 | 60 | 0.000 |
| HVR | HVR | 863 | 844 | 59 | 0.000 |

|     |     |     |     |    |       |
|-----|-----|-----|-----|----|-------|
| HVR | HVR | 956 | 803 | 57 | 0.000 |
| HVR | HVR | 690 | 903 | 57 | 0.000 |
| HVR | HVR | 959 | 817 | 56 | 0.000 |
| HVR | HVR | 863 | 817 | 53 | 0.000 |
| HVR | HVR | 863 | 778 | 52 | 0.000 |
| HVR | HVR | 809 | 741 | 52 | 0.000 |
| HVR | HVR | 860 | 851 | 51 | 0.000 |
| HVR | HVR | 817 | 725 | 51 | 0.000 |
| HVR | HVR | 863 | 790 | 50 | 0.000 |
| HVR | HVR | 817 | 741 | 50 | 0.000 |
| HVR | HVR | 959 | 816 | 48 | 0.000 |
| HVR | HVR | 849 | 895 | 48 | 0.000 |
| HVR | HVR | 788 | 809 | 48 | 0.000 |
| HVR | HVR | 956 | 790 | 47 | 0.000 |
| HVR | HVR | 956 | 853 | 46 | 0.000 |
| HVR | HVR | 839 | 784 | 45 | 0.000 |
| HVR | HVR | 839 | 741 | 43 | 0.000 |
| HVR | HVR | 853 | 785 | 42 | 0.000 |
| HVR | HVR | 871 | 784 | 41 | 0.000 |
| HVR | HVR | 959 | 790 | 40 | 0.000 |
| HVR | HVR | 837 | 785 | 39 | 0.000 |
| HVR | HVR | 959 | 784 | 38 | 0.000 |
| HVR | HVR | 849 | 816 | 38 | 0.000 |
| HVR | HVR | 865 | 780 | 37 | 0.000 |
| HVR | HVR | 959 | 693 | 33 | 0.000 |
| HVR | HVR | 690 | 784 | 31 | 0.000 |
| HVR | HVR | 690 | 693 | 31 | 0.000 |
| HVR | HVR | 849 | 741 | 31 | 0.000 |
| HVR | HVR | 959 | 860 | 28 | 0.001 |
| HVR | HVR | 803 | 865 | 28 | 0.001 |
| HVR | HVR | 844 | 784 | 28 | 0.001 |
| HVR | HVR | 839 | 718 | 27 | 0.001 |
| HVR | HVR | 777 | 865 | 26 | 0.001 |
| HVR | HVR | 790 | 784 | 26 | 0.001 |
| HVR | HVR | 863 | 693 | 25 | 0.002 |
| HVR | HVR | 956 | 809 | 24 | 0.002 |
| HVR | HVR | 790 | 817 | 24 | 0.002 |
| HVR | HVR | 817 | 883 | 23 | 0.003 |
| HVR | HVR | 959 | 788 | 21 | 0.003 |
| HVR | HVR | 690 | 741 | 21 | 0.003 |
| HVR | HVR | 817 | 796 | 21 | 0.003 |
| HVR | HVR | 837 | 844 | 21 | 0.003 |
| HVR | HVR | 817 | 790 | 20 | 0.003 |
| HVR | HVR | 839 | 913 | 20 | 0.003 |
| HVR | HVR | 959 | 858 | 20 | 0.003 |
| HVR | HVR | 858 | 809 | 17 | 0.007 |
| HVR | HVR | 790 | 809 | 16 | 0.008 |
| HVR | HVR | 959 | 780 | 15 | 0.009 |

## SI References

1. Gatsogiannis C, et al. (2013) A syringe-like injection mechanism in *Photobacterium luminescens* toxins. *Nature* 495(7442):520–523.
2. Gatsogiannis C, et al. (2016) Membrane insertion of a Tc toxin in near-atomic detail. *Nat Struct Mol Biol* 23(10):884–890.
3. Denisov IG, Grinkova YV, Lazarides AA, Sligar SG (2004) Directed self-assembly of monodisperse phospholipid bilayer Nanodiscs with controlled size. *J Am Chem Soc* 126(11):3477–3487.
4. Zheng SQ, et al. (2017) MotionCor2: anisotropic correction of beam-induced motion for improved cryo-electron microscopy. *Nat Methods* 14(4):331–332.
5. Penczek PA, et al. (2014) CTER-rapid estimation of CTF parameters with error assessment. *Ultramicroscopy* 140:9–19.
6. Moriya T, et al. (2017) High-resolution Single Particle Analysis from Electron Cryo-microscopy Images Using SPHIRE. *J Vis Exp* 2017(123):e55448–e55448.
7. Yang Z, Fang J, Chittuluru J, Asturias FJ, Penczek PA (2012) Iterative stable alignment and clustering of 2D transmission electron microscope images. *Structure* 20(2):237–247.
8. Zhang K, Li M, Sun F (2011) *Gautomatch: an efficient and convenient gpu-based automatic particle selection program*.
9. Wagner T, et al. (2018) SPHIRE-crYOLO: A fast and well-centering automated particle picker for cryo-EM. *bioRxiv* 145:356584.
10. Lopéz-Blanco JR, Chacón P (2013) iMODFIT: efficient and robust flexible fitting based on vibrational analysis in internal coordinates. *J Struct Biol* 184(2):261–270.
11. Emsley P, Lohkamp B, Scott WG, Cowtan K (2010) Features and development of Coot. *Acta Crystallogr D Biol Crystallogr* 66(Pt 4):486–501.
12. Afonine PV, et al. (2018) Real-space refinement in Phenix for cryo-EM and crystallography. doi:10.1101/249607.
13. Kim DE, Chivian D, Baker D (2004) Protein structure prediction and analysis using the Robetta server. *Nucleic Acids Res* 32(Web Server issue):W526–31.
14. DiMaio F, et al. (2015) Atomic-accuracy models from 4.5-Å cryo-electron microscopy data with density-guided iterative local refinement. *Nat Methods* 12(4):361–365.
15. Barad BA, et al. (2015) EMRinger: side chain-directed model and map validation for 3D cryo-electron microscopy. *Nat Methods* 12(10):943–946.
16. Chen VB, et al. (2010) MolProbity: all-atom structure validation for macromolecular crystallography. *Acta Crystallogr D Biol Crystallogr* 66(Pt 1):12–21.
17. Efremov RG, Leitner A, Aebersold R, Raunser S (2015) Architecture and conformational switch mechanism of the ryanodine receptor. *Nature* 517(7532):39–43.

18. Goetze M, et al. (2015) Automated Assignment of MS/MS Cleavable Cross-Links in Protein 3D-Structure Analysis. *J Am Soc Mass Spectrom* 26(1):83–97.
19. Grimm M, Zimniak T, Kahraman A, Herzog F (2015) xVis: a web server for the schematic visualization and interpretation of crosslink-derived spatial restraints. *Nucleic Acids Res* 43(W1):W362–9.
20. Masood TB, Sandhya S, Chandra N, Natarajan V (2015) CHEXVIS: a tool for molecular channel extraction and visualization. *BMC Bioinformatics* 16(1):119.
21. Pettersen EF, et al. (2004) UCSF Chimera--a visualization system for exploratory research and analysis. *J Comput Chem* 25(13):1605–1612.
22. Anandakrishnan R, Aguilar B, Onufriev AV (2012) H++ 3.0: automating pK prediction and the preparation of biomolecular structures for atomistic molecular modeling and simulations. *Nucleic Acids Res* 40(Web Server issue):W537–41.
23. Altschul SF, Gish W, Miller W, Myers EW, Lipman DJ (1990) Basic local alignment search tool. *J Mol Biol* 215(3):403–410.
24. Sievers F, et al. (2011) Fast, scalable generation of high-quality protein multiple sequence alignments using Clustal Omega. *Mol Syst Biol* 7(1):539–539.
25. Ashkenazy H, et al. (2016) ConSurf 2016: an improved methodology to estimate and visualize evolutionary conservation in macromolecules. *Nucleic Acids Res* 44(W1):W344–50.
